# Supplementary material
Source: Copernicus journal article supplement (doi:10.5194/hess-30-2931-2026)
Supplement: Supplementary file 1 [file hess-30-2931-2026-supplement.pdf]

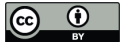

*Supplement of*

## **Regionalization of IDF curves for mainland China: a comparative evaluation of machine learning versus spatial interpolation techniques**

**Yuantian Jiang et al.**

*Correspondence to:* Wenting Wang ([wangwenting@bnu.edu.cn](mailto:wangwenting@bnu.edu.cn))

The copyright of individual parts of the supplement might differ from the article licence.

## Contents of this file

Figures S1 to S6  
Tables S1 to S49

## Introduction

**Figures S1 and S2** illustrate the spatial context of the study, showing the distribution of the 2,363 hourly observation stations overlaid on elevation and mean annual precipitation maps, respectively. To provide a more granular regional assessment, an alternative regionalization scheme based on the nine major river basins of China is presented in **Figure S3**.

Feature importance analysis using Shapley Additive Explanations (SHAP) for the Gradient Boosting (GB) model is detailed in **Figure S4** which quantifies the contribution of each input feature to the model's predictions for the four representative Intensity-Duration-Frequency (IDF) cases.

**Figure S5** presents the relative errors between observations and predictions for the best-performing interpolation (Kriging with External Drift using mean annual precipitation, KED\_AP) and machine learning (GB) methods. The distributions of residuals for both methods are shown in **Figure S6**, which helps assess model bias and error characteristics.

A series of tables provide detailed data and results. **Tables S1 to S12** show the accuracy metrics of ten different machine learning (ML) methods using three distinct gridded precipitation datasets (CGDPP, CHIRPS, and CHM\_PRE), demonstrating the rationale for selecting CHM\_PRE for the main analysis. A brief description of these ten ML methods is provided in **Table S13**.

**Tables S14 to S17** detail the hyperparameter grids used in our grid search for the Random Forest (RF), Gradient Boosting (GB), ExtraTrees (ET), and Multilayer Perceptron (MLP) models. To ensure a more thorough exploration of the parameter space, we subsequently employed a hyperparameter tuning method, Bayesian optimization. The search ranges used for this optimization are detailed in **Tables S18 to S21**. The final performance metrics of the models based on Bayesian optimization are summarized in **Table S22**.

The results of the regional performance evaluation using the nine-major-river-basins scheme are presented in **Tables S23 to S30**. These tables show the accuracy metrics for the KED\_AP and GB methods across each basin for all four test cases.

Comprehensive results for the generated regionalized IDF products are provided. **Table S31** lists the optimal regionalization method selected for each of the 243 IDF cases for the 0.1° product based on CHM\_PRE. The corresponding performance metrics (NSE, PBIAS, RMSE, and KGE) for this product are detailed in **Tables S32 to S35**. An alternative, lower-resolution (0.5°) IDF product based on the CGDPP dataset is also provided, with its optimal methods and performance metrics shown in **Tables S36 to S40**. To resolve potential crossing phenomena within the generated curves, a bivariate isotonic regression was applied as post-processing. This procedure yielded the final regionalized IDF datasets, ensuring physical consistency with negligible impact on accuracy. The performance

metrics for these final datasets are provided in **Tables S41 to S48**. **Table S49** summarizes the statistical characteristics of the station-level IDF data used as the ground truth in this study.

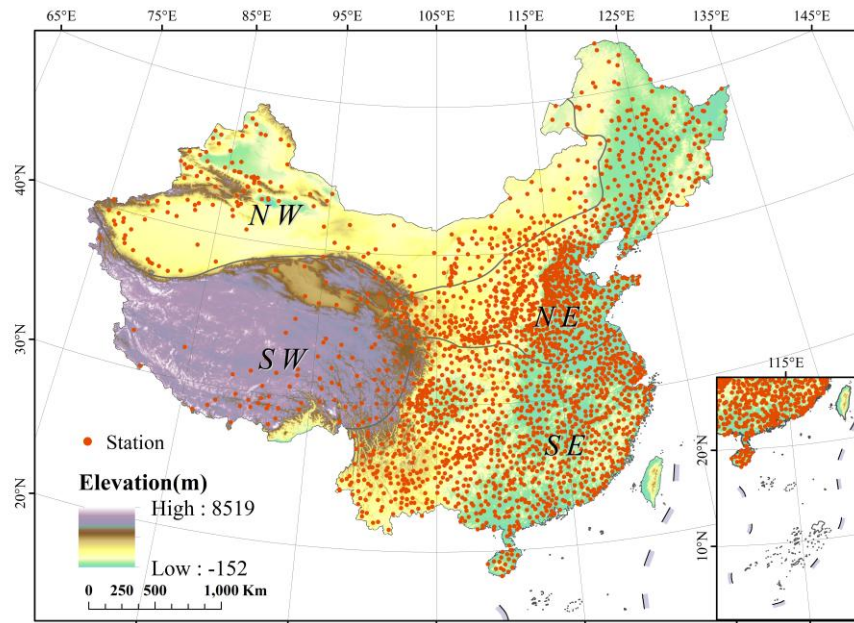

**Figure S1.** The spatial distribution of 2,122 hourly observation stations and elevation across the study area.

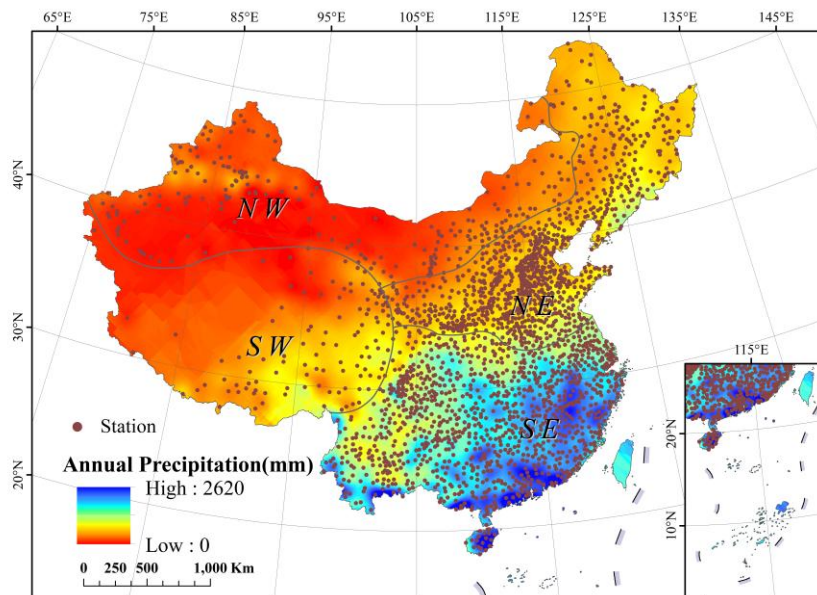

**Figure S2.** The spatial distribution of 2,122 hourly observation stations and the mean annual precipitation across the study area.

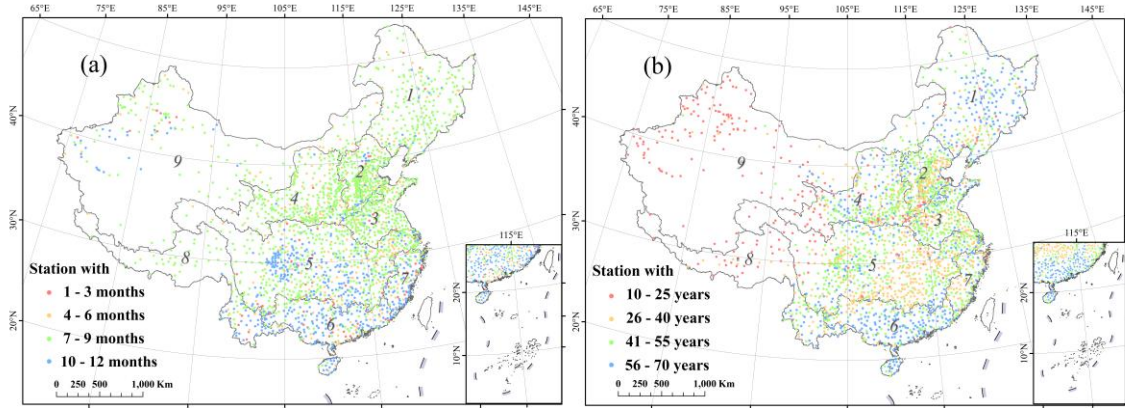

**Figure S3.** The spatial distribution of the nine major river basins in mainland China, which were used as an alternative regionalization scheme for performance evaluation. The numbered basins are: 1: Songhua and Liaohe River Basin; 2: Haihe River Basin; 3: Huaihe River Basin; 4: Yellow River Basin; 5: Yangtze River Basin; 6: Pearl River Basin; 7: Southeast Basin; 8: Southwest Basin; 9: Continental Basin.

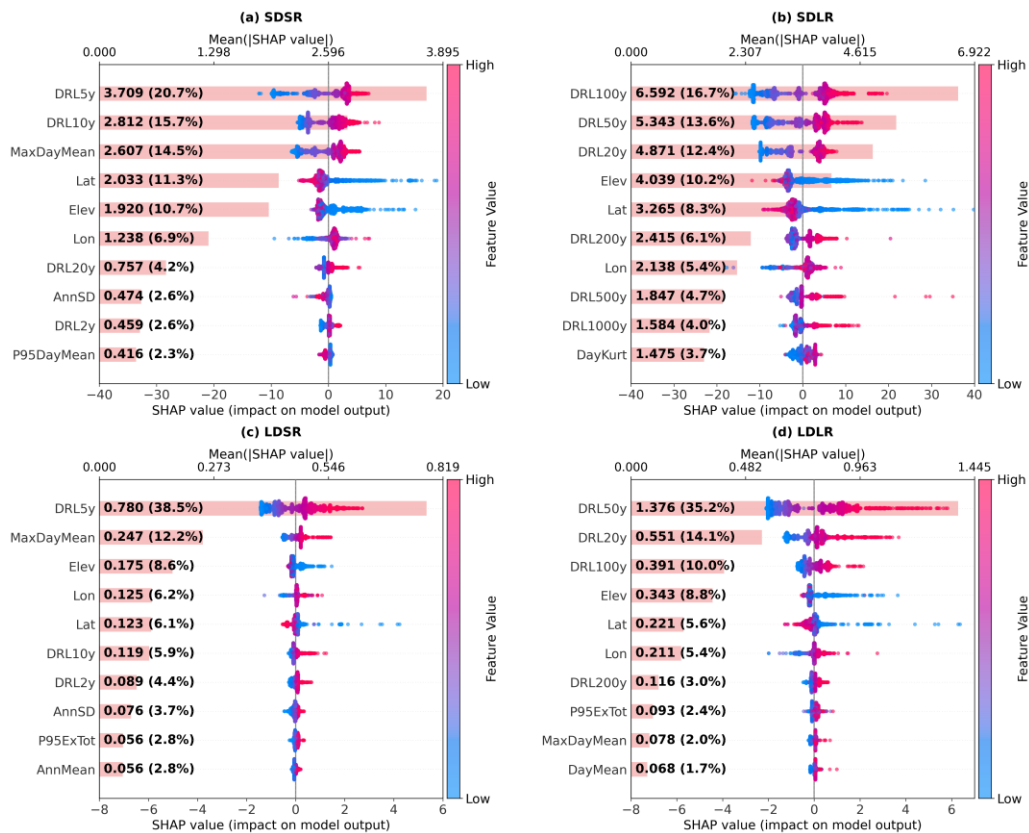

**Figure S4.** SHAP feature importance for GB-based IDF regionalization for the four considered cases in mainland China. Horizontal bars show global importance as the mean absolute SHAP values (mean|SHAP|) with percentages; beeswarm points show sample-level signed SHAP values; point color encodes the standardized feature value (z-score) from low to high. Abbreviations are Lat: latitude; Lon: longitude; Elev: elevation;

AnnMean: mean annual precipitation; AnnSD: standard deviation of annual precipitation; DayMean: mean daily precipitation; DayKurt: kurtosis of daily precipitation; MaxDayMean: multi-year mean of the annual maximum daily precipitation; P95DayMean: multi-year mean of the annual 95th percentile of daily precipitation; P95ExTot: multi-year mean annual total precipitation from days exceeding the 95th percentile; DRL2y-DRL1000y: daily return level for a 2-1000 year return period.

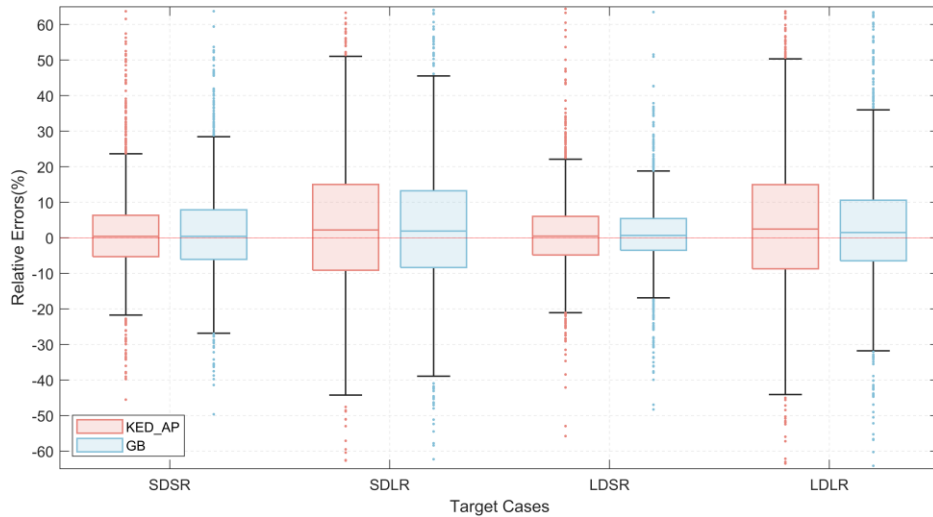

**Figure S5.** Relative errors of predicted intensities for KED\_AP (the best interpolation method) and GB (the best machine learning method).

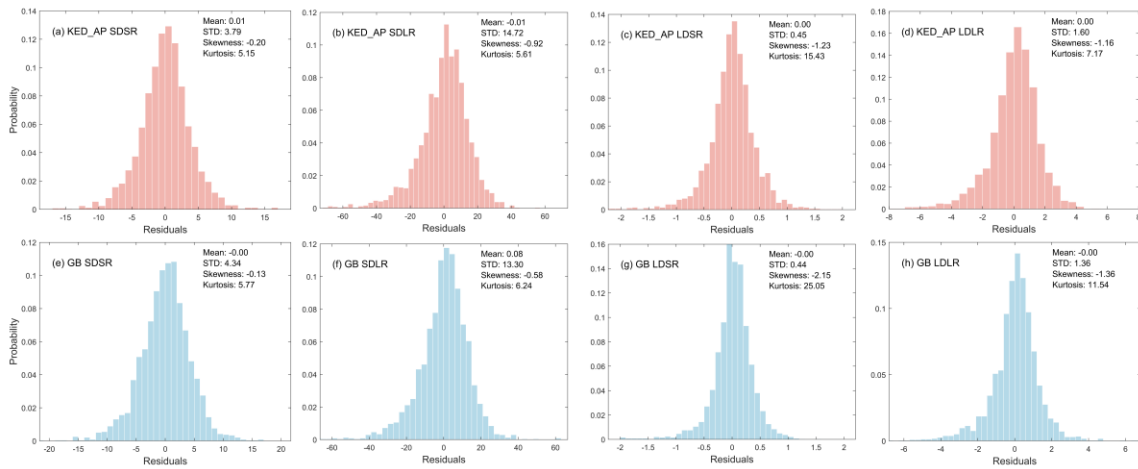

**Figure S6.** Residual histograms for KED\_AP (the best interpolation method, (a)-(d)) and GB (the best machine learning method, (e)-(h)). Skewness of 0 and kurtosis of 3 are expected of the normal distribution.

**Table S1.** Accuracy metrics of machine learning methods for SDSR (1-hour rainfall intensity for a 5-year return period) using CGDPP.

|                                  | <b>NSE</b> | <b>PBIAS(%)</b> | <b>RMSE(mm/hr)</b> | <b>KGE</b> |
|----------------------------------|------------|-----------------|--------------------|------------|
| <b>AdaBoost Regression</b>       | 0.88       | 1.24            | 5.36               | 0.87       |
| <b>Bayesian Ridge Regression</b> | 0.87       | 0.03            | 5.69               | 0.90       |
| <b>ExtraTrees Regression</b>     | 0.91       | 0.43            | 4.61               | 0.94       |
| <b>Gradient Boosting</b>         | 0.91       | 0.05            | 4.60               | 0.93       |
| <b>K-Nearest Neighbors</b>       | 0.89       | 0.92            | 5.10               | 0.92       |
| <b>Regression</b>                |            |                 |                    |            |
| <b>Linear Regression</b>         | 0.84       | 0.16            | 6.24               | 0.90       |
| <b>Multilayer Perceptron</b>     | 0.86       | -0.30           | 5.85               | 0.92       |
| <b>Random Forest</b>             | 0.92       | 0.33            | 4.32               | 0.94       |
| <b>Ridge Regression</b>          | 0.87       | 0.02            | 5.70               | 0.90       |
| <b>Support Vector Regression</b> | 0.83       | -0.44           | 6.39               | 0.83       |

**Table S2.** Accuracy metrics of machine learning methods for SCLR (1-hour rainfall intensity for a 100-year return period) using CGDPP.

|                                  | <b>NSE</b> | <b>PBIAS(%)</b> | <b>RMSE(mm/hr)</b> | <b>KGE</b> |
|----------------------------------|------------|-----------------|--------------------|------------|
| <b>AdaBoost Regression</b>       | 0.70       | 8.13            | 17.86              | 0.74       |
| <b>Bayesian Ridge Regression</b> | 0.73       | 0.03            | 16.84              | 0.80       |
| <b>ExtraTrees Regression</b>     | 0.73       | 0.75            | 17.04              | 0.84       |
| <b>Gradient Boosting</b>         | 0.78       | 0.02            | 15.38              | 0.83       |
| <b>K-Nearest Neighbors</b>       | 0.75       | 0.90            | 16.38              | 0.82       |
| <b>Regression</b>                |            |                 |                    |            |
| <b>Linear Regression</b>         | 0.63       | 0.27            | 19.69              | 0.78       |
| <b>Multilayer Perceptron</b>     | 0.71       | -0.97           | 17.50              | 0.82       |
| <b>Random Forest</b>             | 0.76       | 0.74            | 15.89              | 0.84       |
| <b>Ridge Regression</b>          | 0.73       | 0.03            | 16.83              | 0.80       |
| <b>Support Vector Regression</b> | 0.66       | -3.29           | 18.89              | 0.68       |

**Table S3.** Accuracy metrics of machine learning methods for LDSR (24-hour rainfall intensity for a 5-year return period) using CGDPP.

|                                  | <b>NSE</b> | <b>PBIAS(%)</b> | <b>RMSE(mm/hr)</b> | <b>KGE</b> |
|----------------------------------|------------|-----------------|--------------------|------------|
| <b>AdaBoost Regression</b>       | 0.91       | 2.82            | 0.59               | 0.88       |
| <b>Bayesian Ridge Regression</b> | 0.93       | 0.00            | 0.51               | 0.95       |
| <b>ExtraTrees Regression</b>     | 0.92       | 0.17            | 0.54               | 0.95       |
| <b>Gradient Boosting</b>         | 0.93       | -0.07           | 0.50               | 0.95       |
| <b>K-Nearest Neighbors</b>       | 0.92       | 0.37            | 0.54               | 0.94       |
| <b>Regression</b>                |            |                 |                    |            |
| <b>Linear Regression</b>         | 0.89       | 0.19            | 0.66               | 0.94       |
| <b>Multilayer Perceptron</b>     | 0.92       | 0.28            | 0.55               | 0.95       |
| <b>Random Forest</b>             | 0.93       | 0.09            | 0.51               | 0.95       |
| <b>Ridge Regression</b>          | 0.93       | 0.00            | 0.51               | 0.95       |

|                                  |      |       |      |      |
|----------------------------------|------|-------|------|------|
| <b>Support Vector Regression</b> | 0.92 | -0.40 | 0.55 | 0.93 |
|----------------------------------|------|-------|------|------|

**Table S4.** Accuracy metrics of machine learning methods for LDLR (24-hour rainfall intensity for a 100-year return period) using CGDPP.

|                                       | <b>NSE</b> | <b>PBIAS(%)</b> | <b>RMSE(mm/hr)</b> | <b>KGE</b> |
|---------------------------------------|------------|-----------------|--------------------|------------|
| <b>AdaBoost Regression</b>            | 0.75       | 9.93            | 1.96               | 0.74       |
| <b>Bayesian Ridge Regression</b>      | 0.82       | 0.01            | 1.63               | 0.87       |
| <b>ExtraTrees Regression</b>          | 0.77       | 0.53            | 1.86               | 0.87       |
| <b>Gradient Boosting</b>              | 0.82       | 0.16            | 1.63               | 0.87       |
| <b>K-Nearest Neighbors Regression</b> | 0.81       | 0.38            | 1.70               | 0.86       |
| <b>Linear Regression</b>              | 0.68       | 0.33            | 2.22               | 0.83       |
| <b>Multilayer Perceptron</b>          | 0.82       | 0.09            | 1.65               | 0.88       |
| <b>Random Forest</b>                  | 0.80       | 0.51            | 1.72               | 0.87       |
| <b>Ridge Regression</b>               | 0.83       | 0.00            | 1.63               | 0.87       |
| <b>Support Vector Regression</b>      | 0.80       | -2.40           | 1.74               | 0.84       |

**Table S5.** Accuracy metrics of machine learning methods for SDSR (1-hour rainfall intensity for a 5-year return period) using CHIRPS.

|                                       | <b>NSE</b> | <b>PBIAS(%)</b> | <b>RMSE(mm/hr)</b> | <b>KGE</b> |
|---------------------------------------|------------|-----------------|--------------------|------------|
| <b>AdaBoost Regression</b>            | 0.87       | 3.36            | 5.60               | 0.85       |
| <b>Bayesian Ridge Regression</b>      | 0.80       | -0.01           | 6.93               | 0.85       |
| <b>ExtraTrees Regression</b>          | 0.92       | 0.26            | 4.45               | 0.93       |
| <b>Gradient Boosting</b>              | 0.90       | 0.10            | 4.86               | 0.92       |
| <b>K-Nearest Neighbors Regression</b> | 0.86       | 0.62            | 5.83               | 0.88       |
| <b>Linear Regression</b>              | 0.80       | -0.12           | 7.02               | 0.86       |
| <b>Multilayer Perceptron</b>          | 0.84       | -0.17           | 6.15               | 0.90       |
| <b>Random Forest</b>                  | 0.92       | 0.12            | 4.43               | 0.93       |
| <b>Ridge Regression</b>               | 0.80       | 0.00            | 6.99               | 0.85       |
| <b>Support Vector Regression</b>      | 0.80       | -0.85           | 7.02               | 0.78       |

**Table S6.** Accuracy metrics of machine learning methods for SDLR (1-hour rainfall intensity for a 100-year return period) using CHIRPS.

|                                  | <b>NSE</b> | <b>PBIAS(%)</b> | <b>RMSE(mm/hr)</b> | <b>KGE</b> |
|----------------------------------|------------|-----------------|--------------------|------------|
| <b>AdaBoost Regression</b>       | 0.65       | 9.89            | 19.22              | 0.68       |
| <b>Bayesian Ridge Regression</b> | 0.63       | 0.01            | 19.87              | 0.71       |

|                                       |      |       |       |      |
|---------------------------------------|------|-------|-------|------|
| <b>ExtraTrees Regression</b>          | 0.76 | 0.95  | 15.78 | 0.82 |
| <b>Gradient Boosting</b>              | 0.74 | 0.33  | 16.54 | 0.80 |
| <b>K-Nearest Neighbors Regression</b> | 0.68 | 1.10  | 18.46 | 0.77 |
| <b>Linear Regression</b>              | 0.63 | -0.03 | 19.87 | 0.71 |
| <b>Multilayer Perceptron</b>          | 0.67 | -0.59 | 18.67 | 0.77 |
| <b>Random Forest</b>                  | 0.76 | 0.63  | 15.93 | 0.82 |
| <b>Ridge Regression</b>               | 0.62 | 0.03  | 19.91 | 0.70 |
| <b>Support Vector Regression</b>      | 0.57 | -4.68 | 21.28 | 0.60 |

**Table S7.** Accuracy metrics of machine learning methods for LDSR (24-hour rainfall intensity for a 5-year return period) using CHIRPS.

|                                       | <b>NSE</b> | <b>PBIAS(%)</b> | <b>RMSE(mm/hr)</b> | <b>KGE</b> |
|---------------------------------------|------------|-----------------|--------------------|------------|
| <b>AdaBoost Regression</b>            | 0.83       | 6.55            | 0.81               | 0.80       |
| <b>Bayesian Ridge Regression</b>      | 0.81       | 0.00            | 0.85               | 0.86       |
| <b>ExtraTrees Regression</b>          | 0.91       | 0.09            | 0.57               | 0.92       |
| <b>Gradient Boosting</b>              | 0.89       | -0.01           | 0.64               | 0.92       |
| <b>K-Nearest Neighbors Regression</b> | 0.85       | -0.44           | 0.76               | 0.87       |
| <b>Linear Regression</b>              | 0.81       | -0.08           | 0.85               | 0.86       |
| <b>Multilayer Perceptron</b>          | 0.87       | 0.04            | 0.71               | 0.90       |
| <b>Random Forest</b>                  | 0.91       | -0.02           | 0.58               | 0.92       |
| <b>Ridge Regression</b>               | 0.81       | 0.01            | 0.84               | 0.86       |
| <b>Support Vector Regression</b>      | 0.84       | -1.83           | 0.78               | 0.85       |

**Table S8.** Accuracy metrics of machine learning methods for LDLR (24-hour rainfall intensity for a 100-year return period) using CHIRPS.

|                                       | <b>NSE</b> | <b>PBIAS(%)</b> | <b>RMSE(mm/hr)</b> | <b>KGE</b> |
|---------------------------------------|------------|-----------------|--------------------|------------|
| <b>AdaBoost Regression</b>            | 0.64       | 12.29           | 2.34               | 0.65       |
| <b>Bayesian Ridge Regression</b>      | 0.67       | 0.05            | 2.25               | 0.74       |
| <b>ExtraTrees Regression</b>          | 0.79       | 0.65            | 1.78               | 0.84       |
| <b>Gradient Boosting</b>              | 0.76       | 0.28            | 1.89               | 0.82       |
| <b>K-Nearest Neighbors Regression</b> | 0.71       | 0.02            | 2.11               | 0.78       |
| <b>Linear Regression</b>              | 0.66       | 0.02            | 2.25               | 0.74       |
| <b>Multilayer Perceptron</b>          | 0.72       | -0.21           | 2.05               | 0.79       |
| <b>Random Forest</b>                  | 0.79       | 0.29            | 1.79               | 0.84       |
| <b>Ridge Regression</b>               | 0.67       | 0.05            | 2.25               | 0.74       |
| <b>Support Vector Regression</b>      | 0.69       | -3.78           | 2.18               | 0.73       |

**Table S9.** Accuracy metrics of machine learning methods for SDSR (1-hour rainfall intensity for a 5-year return period) using CHM\_PRE.

|                                  | <b>NSE</b> | <b>PBIAS(%)</b> | <b>RMSE(mm/hr)</b> | <b>KGE</b> |
|----------------------------------|------------|-----------------|--------------------|------------|
| <b>AdaBoost Regression</b>       | 0.89       | 2.04            | 5.09               | 0.87       |
| <b>Bayesian Ridge Regression</b> | 0.89       | 0.00            | 5.23               | 0.92       |

|                                  |      |       |      |      |
|----------------------------------|------|-------|------|------|
| <b>ExtraTrees Regression</b>     | 0.92 | 0.10  | 4.50 | 0.93 |
| <b>Gradient Boosting</b>         | 0.92 | -0.02 | 4.34 | 0.94 |
| <b>K-Nearest Neighbors</b>       | 0.90 | 0.13  | 5.00 | 0.92 |
| <b>Regression</b>                |      |       |      |      |
| <b>Linear Regression</b>         | 0.89 | 0.00  | 5.24 | 0.92 |
| <b>Multilayer Perceptron</b>     | 0.88 | -0.50 | 5.36 | 0.93 |
| <b>Random Forest</b>             | 0.92 | 0.16  | 4.34 | 0.94 |
| <b>Ridge Regression</b>          | 0.89 | 0.00  | 5.25 | 0.92 |
| <b>Support Vector Regression</b> | 0.85 | -0.89 | 6.12 | 0.85 |

**Table S10.** Accuracy metrics of machine learning methods for SDLR (1-hour rainfall intensity for a 100-year return period) using CHM\_PRE.

|                                  | <b>NSE</b> | <b>PBIAS(%)</b> | <b>RMSE(mm/hr)</b> | <b>KGE</b> |
|----------------------------------|------------|-----------------|--------------------|------------|
| <b>AdaBoost Regression</b>       | 0.76       | 6.48            | 15.76              | 0.74       |
| <b>Bayesian Ridge Regression</b> | 0.81       | -0.01           | 14.33              | 0.86       |
| <b>ExtraTrees Regression</b>     | 0.82       | 0.41            | 13.93              | 0.87       |
| <b>Gradient Boosting</b>         | 0.83       | 0.11            | 13.29              | 0.87       |
| <b>K-Nearest Neighbors</b>       | 0.80       | 0.00            | 14.69              | 0.85       |
| <b>Regression</b>                |            |                 |                    |            |
| <b>Linear Regression</b>         | 0.80       | 0.05            | 14.56              | 0.86       |
| <b>Multilayer Perceptron</b>     | 0.78       | -1.21           | 15.10              | 0.87       |
| <b>Random Forest</b>             | 0.83       | 0.37            | 13.49              | 0.87       |
| <b>Ridge Regression</b>          | 0.81       | -0.01           | 14.33              | 0.86       |
| <b>Support Vector Regression</b> | 0.72       | -3.36           | 17.24              | 0.73       |

**Table S11.** Accuracy metrics of machine learning methods for LDSR (24-hour rainfall intensity for a 5-year return period) using CHM\_PRE.

|                                  | <b>NSE</b> | <b>PBIAS(%)</b> | <b>RMSE(mm/hr)</b> | <b>KGE</b> |
|----------------------------------|------------|-----------------|--------------------|------------|
| <b>AdaBoost Regression</b>       | 0.88       | 8.06            | 0.68               | 0.82       |
| <b>Bayesian Ridge Regression</b> | 0.93       | -0.02           | 0.50               | 0.95       |
| <b>ExtraTrees Regression</b>     | 0.93       | 0.01            | 0.50               | 0.95       |
| <b>Gradient Boosting</b>         | 0.95       | -0.07           | 0.44               | 0.96       |
| <b>K-Nearest Neighbors</b>       | 0.93       | -0.60           | 0.53               | 0.94       |
| <b>Regression</b>                |            |                 |                    |            |
| <b>Linear Regression</b>         | 0.93       | -0.04           | 0.50               | 0.95       |
| <b>Multilayer Perceptron</b>     | 0.95       | -0.14           | 0.45               | 0.97       |
| <b>Random Forest</b>             | 0.94       | -0.03           | 0.47               | 0.96       |
| <b>Ridge Regression</b>          | 0.93       | -0.02           | 0.50               | 0.95       |
| <b>Support Vector Regression</b> | 0.92       | -1.36           | 0.55               | 0.93       |

**Table S12.** Accuracy metrics of machine learning methods for LDLR (24-hour rainfall intensity for a 100-year return period) using CHM\_PRE.

|                                           | <b>NSE</b> | <b>PBIAS(%)</b> | <b>RMSE(mm/hr)</b> | <b>KGE</b> |
|-------------------------------------------|------------|-----------------|--------------------|------------|
| <b>AdaBoost Regression</b>                | 0.78       | 10.97           | 1.83               | 0.72       |
| <b>Bayesian Ridge Regression</b>          | 0.87       | -0.03           | 1.40               | 0.90       |
| <b>ExtraTrees Regression</b>              | 0.86       | 0.18            | 1.45               | 0.90       |
| <b>Gradient Boosting</b>                  | 0.88       | -0.05           | 1.36               | 0.91       |
| <b>K-Nearest Neighbors<br/>Regression</b> | 0.85       | -0.72           | 1.50               | 0.89       |
| <b>Linear Regression</b>                  | 0.87       | 0.00            | 1.41               | 0.91       |
| <b>Multilayer Perceptron</b>              | 0.87       | 0.18            | 1.37               | 0.91       |
| <b>Random Forest</b>                      | 0.87       | 0.22            | 1.37               | 0.91       |
| <b>Ridge Regression</b>                   | 0.87       | -0.03           | 1.40               | 0.90       |
| <b>Support Vector Regression</b>          | 0.84       | -2.06           | 1.55               | 0.87       |

**Table S13.** Ten different Machine learning methods used for the 4 test intensities. The details can be found in the user guide of scikit-learn ([https://scikit-learn.org/stable/user\\_guide.html](https://scikit-learn.org/stable/user_guide.html)).

| <b>Machine Learning Method</b>    | <b>Description</b>                                                                                                                                                                                                                                                              |
|-----------------------------------|---------------------------------------------------------------------------------------------------------------------------------------------------------------------------------------------------------------------------------------------------------------------------------|
| AdaBoost Regression               | A boosting technique that adjusts the weights of training samples based on previous errors, focusing more on difficult-to-predict instances in subsequent weak learners.                                                                                                        |
| Bayesian Ridge Regression         | A Bayesian approach to linear regression that includes a probabilistic model and regularization, offering a distribution over model parameters rather than point estimates.                                                                                                     |
| ExtraTrees Regression             | Similar to Random Forest, but with more randomization in selecting splits, leading to reduced variance and often faster computation.                                                                                                                                            |
| Gradient Boosting                 | An ensemble technique that builds decision trees sequentially, with each tree trying to correct the residual errors of the previous trees, optimizing the overall loss function. At each stage a regression tree is fitted to the negative gradient of the given loss function. |
| K-Nearest Neighbors<br>Regression | A non-parametric method that predicts the target value based on the average or weighted average of the k-nearest data points in the feature space.                                                                                                                              |
| Linear Regression                 | A basic linear approach that models the relationship between input features and the target as a linear combination of the input variables.                                                                                                                                      |

|                           |                                                                                                                                                                                                 |
|---------------------------|-------------------------------------------------------------------------------------------------------------------------------------------------------------------------------------------------|
| Multilayer Perceptron     | A type of feedforward neural network with one or more hidden layers, capable of learning complex non-linear relationships between inputs and outputs.                                           |
| Random Forest             | A bagging-based ensemble method that builds multiple decision trees and merges their results to improve accuracy and prevent overfitting.                                                       |
| Ridge Regression          | A variant of linear regression that includes a regularization term (L2 penalty) to prevent overfitting by shrinking the coefficients of less important features.                                |
| Support Vector Regression | A regression variant of support vector machine that attempts to find a hyperplane that best fits the data within a certain margin of tolerance, used for both linear and non-linear regression. |

**Table S14.** Hyperparameter grid for random forest (RF). The default hyperparameters in the scikit-learn library are highlighted in red. (Grid Search)

| Hyperparameter    | Values                                 |
|-------------------|----------------------------------------|
| n_estimators      | 50, <b>100</b> , 150, 200, 500         |
| min_samples_split | <b>2</b> , 5, 10, 20, 30               |
| max_features      | 0.3, 0.5, <b>None</b> , "sqrt", "log2" |

**Table S15.** Hyperparameter grid for gradient boosting (GB). The default hyperparameters in the scikit-learn library are highlighted in red. (Grid Search)

| Hyperparameter | Values                                 |
|----------------|----------------------------------------|
| n_estimators   | 50, <b>100</b> , 150, 200, 500         |
| max_depth      | <b>3</b> , 4, 5, 10                    |
| max_features   | 0.3, 0.5, <b>None</b> , "sqrt", "log2" |
| subsample      | 0.2, 0.5, <b>1</b>                     |
| learning_rate  | 0.05, <b>0.1</b> , 0.2, 0.5            |

**Table S16.** Hyperparameter grid for ExtraTrees (ET). The default hyperparameters in the scikit-learn library are highlighted in red. (Grid Search)

| Hyperparameter    | Values                                 |
|-------------------|----------------------------------------|
| n_estimators      | 50, <b>100</b> , 150, 200, 500         |
| min_samples_split | <b>2</b> , 5, 10, 20, 30               |
| max_features      | 0.3, 0.5, <b>None</b> , "sqrt", "log2" |

**Table S17.** Hyperparameter grid for multilayer perceptron (MLP). The default hyperparameters in the scikit-learn library are highlighted in red. (Grid Search)

| Hyperparameter     | Values                                                                                                                                              |
|--------------------|-----------------------------------------------------------------------------------------------------------------------------------------------------|
| hidden_layer_sizes | (50), (100), (500), (750), (1000), (150, 150), (200, 200), (250, 250), (15, 30, 45), (30, 45, 30), (45, 30, 15), (10, 10, 10, 10), (15, 15, 15, 15) |
| activation         | 'logistic', 'tanh', 'relu', 'identity'                                                                                                              |
| alpha              | 0.0001, 0.001, 0.01, 0.1                                                                                                                            |

**Table S18.** Hyperparameter search ranges for the Random Forest model using Bayesian optimization.

| Hyperparameter    | Search range for Bayesian optimization                              | SDSR | SDLR | LDSR | LDLR |
|-------------------|---------------------------------------------------------------------|------|------|------|------|
| n_estimators      | 50 - 1000                                                           | 914  | 173  | 943  | 1000 |
| min_samples_split | 2 - 50                                                              | 2    | 2    | 2    | 2    |
|                   | 0.10, 0.20, 0.30, 0.40, 0.50, 0.60, 0.70, 0.80, 0.90, None, "sqrt", | None | None | 0.90 | None |
| max_features      | "log2"                                                              |      |      |      |      |

**Table S19.** Hyperparameter search ranges for the Gradient Boosting model using Bayesian optimization.

| Hyperparameter | Search range for Bayesian optimization | SDSR | SDLR | LDSR | LDLR |
|----------------|----------------------------------------|------|------|------|------|
| n_estimators   | 50 - 1000                              | 826  | 1000 | 640  | 607  |
| max_depth      | 2 - 50                                 | 4    | 2    | 2    | 6    |

|               |                                                    |        |        |        |        |
|---------------|----------------------------------------------------|--------|--------|--------|--------|
|               | 0.10, 0.20, 0.30, 0.40,<br>0.50, 0.60, 0.70, 0.80, | 0.90   | 0.40   | 0.20   | 0.10   |
| max_features  | 0.90, None, “sqrt”, “log2”                         |        |        |        |        |
| subsample     | 0.10 - 1.00                                        | 0.3771 | 0.8657 | 0.9867 | 0.2546 |
| learning_rate | 0.01 - 0.50                                        | 0.0791 | 0.1145 | 0.2807 | 0.0100 |

**Table S20.** Hyperparameter search ranges for the Extremely Randomized Trees model using Bayesian optimization.

| Hyperparameter    | Search range for Bayesian optimization                                           | SDSR | SDLR | LDSR | LDLR |
|-------------------|----------------------------------------------------------------------------------|------|------|------|------|
| n_estimators      | 50 - 1000                                                                        | 938  | 899  | 72   | 1000 |
| min_samples_split | 2 - 50                                                                           | 2    | 12   | 4    | 11   |
|                   | 0.10, 0.20, 0.30, 0.40, 0.50, 0.60,<br>0.70, 0.80, 0.90, None, “sqrt”,<br>“log2” | None | None | None | 0.10 |
| max_features      | “log2”                                                                           |      |      |      |      |

**Table S21.** Hyperparameter search ranges for the Multilayer Perceptron model using Bayesian optimization.

| Hyperparameter     | Search range for Bayesian optimization                                          | SDSR     | SDLR      | LDSR      | LDLR       |
|--------------------|---------------------------------------------------------------------------------|----------|-----------|-----------|------------|
|                    | (50,), (64,),<br>(100,), (128,),<br>(256,), (500,),<br>(750,), (1000,)          |          |           |           |            |
| hidden_layer_sizes | (64, 64), (128,<br>64), (64, 128),<br>(150, 150),<br>(200, 200),<br>(250, 250), | (128,64) | (150,150) | (150,150) | (30,45,30) |

|            |                 |        |         |        |        |
|------------|-----------------|--------|---------|--------|--------|
|            | (15, 30, 45),   |        |         |        |        |
|            | (30, 45, 30),   |        |         |        |        |
|            | (45, 30, 15),   |        |         |        |        |
|            | (10, 10, 10,    |        |         |        |        |
|            | 10), (15, 15,   |        |         |        |        |
|            | 15, 15)         |        |         |        |        |
|            | “logistic”,     |        |         |        |        |
| activation | “tanh”, “relu”, | “tanh” | “relu”  | “relu” | “relu” |
|            | “identity”      |        |         |        |        |
| alpha      | (1e-6) - 1      | 0.7277 | 0.01525 | (1e-6) | 0.7825 |

**Table S22.** Accuracy metrics of machine learning methods after hyperparameter tuning via Bayesian optimization.

|     | SDSR |           |             |      | SDLR |           |             |      | LDSR |           |             |      | LDLR |           |             |      |
|-----|------|-----------|-------------|------|------|-----------|-------------|------|------|-----------|-------------|------|------|-----------|-------------|------|
|     | NSE  | PBIAS (%) | RMSE(mm/hr) | KGE  | NSE  | PBIAS (%) | RMSE(mm/hr) | KGE  | NSE  | PBIAS (%) | RMSE(mm/hr) | KGE  | NSE  | PBIAS (%) | RMSE(mm/hr) | KGE  |
| RF  | 0.92 | 0.11      | 4.30        | 0.94 | 0.83 | 0.33      | 13.40       | 0.87 | 0.94 | 0.00      | 0.47        | 0.96 | 0.88 | 0.18      | 1.37        | 0.91 |
| GB  | 0.93 | 0.19      | 4.18        | 0.95 | 0.84 | -0.06     | 13.16       | 0.89 | 0.95 | 0.00      | 0.44        | 0.97 | 0.88 | 0.07      | 1.36        | 0.90 |
| ET  | 0.92 | 0.08      | 4.48        | 0.93 | 0.82 | 0.24      | 13.82       | 0.86 | 0.94 | 0.01      | 0.49        | 0.95 | 0.86 | 0.02      | 1.42        | 0.89 |
| MLP | 0.92 | -0.35     | 4.33        | 0.93 | 0.83 | -0.16     | 13.38       | 0.88 | 0.95 | -0.15     | 0.43        | 0.97 | 0.88 | -0.61     | 1.34        | 0.92 |

**Table S23.** Accuracy metrics for the KED\_AP interpolation method across the nine major river basins for the SDSR

| Region                           | NSE  | PBIAS (%) | RMSE(mm/hr) | KGE  |
|----------------------------------|------|-----------|-------------|------|
| 1.Songhua and Liaohe River Basin | 0.85 | 0.38      | 2.68        | 0.88 |
| 2.Haihe River Basin              | 0.9  | -0.41     | 3.19        | 0.93 |
| 3.Huaihe River Basin             | 0.96 | -0.17     | 3.9         | 0.97 |
| 4.Yellow River Basin             | 0.89 | -0.03     | 3.28        | 0.92 |

|                       |      |       |      |      |
|-----------------------|------|-------|------|------|
| 5.Yangtze River Basin | 0.82 | 0.13  | 4.03 | 0.86 |
| 6.Pearl River Basin   | 0.72 | -0.02 | 5.25 | 0.8  |
| 7.Southeast Basin     | 0.58 | 0.36  | 3.62 | 0.7  |
| 8.Southwest Basin     | 0.09 | -0.72 | 3.44 | 0.25 |
| 9.Continental Basin   | 0.72 | -0.06 | 3    | 0.83 |
| Mainland China        | 0.94 | 0.03  | 3.79 | 0.96 |

**Table S24.** Accuracy metrics for the KED\_AP interpolation method across the nine major river basins for the SDLR

| Region                           | NSE  | PBIAS (%) | RMSE(mm/hr) | KGE  |
|----------------------------------|------|-----------|-------------|------|
| 1.Songhua and Liaohe River Basin | 0.66 | 0.64      | 8.24        | 0.73 |
| 2.Haihe River Basin              | 0.73 | -0.4      | 14.99       | 0.78 |
| 3.Huaihe River Basin             | 0.91 | 0.49      | 12.27       | 0.92 |
| 4.Yellow River Basin             | 0.65 | -0.27     | 15.26       | 0.72 |
| 5.Yangtze River Basin            | 0.57 | 0.09      | 15.22       | 0.65 |
| 6.Pearl River Basin              | 0.52 | -0.07     | 18.33       | 0.62 |
| 7.Southeast Basin                | 0.43 | 0.68      | 15.53       | 0.48 |
|                                  | -    |           |             | -    |
| 8.Southwest Basin                | 0.22 | -2.5      | 14.42       | 0.25 |
| 9.Continental Basin              | 0.27 | -0.48     | 11          | 0.46 |
| Mainland China                   | 0.79 | -0.01     | 14.72       | 0.84 |

**Table S25.** Accuracy metrics for the KED\_AP interpolation method across the nine major river basins for the LDSR

| Region                           | NSE  | PBIAS (%) | RMSE(mm/hr) | KGE  |
|----------------------------------|------|-----------|-------------|------|
| 1.Songhua and Liaohe River Basin | 0.9  | 0.14      | 0.19        | 0.92 |
| 2.Haihe River Basin              | 0.88 | 0.11      | 0.27        | 0.92 |
| 3.Huaihe River Basin             | 0.96 | 0.15      | 0.42        | 0.96 |
| 4.Yellow River Basin             | 0.87 | -0.19     | 0.34        | 0.89 |
| 5.Yangtze River Basin            | 0.86 | -0.1      | 0.44        | 0.89 |

|                     |      |       |      |      |
|---------------------|------|-------|------|------|
| 6.Pearl River Basin | 0.86 | -0.02 | 0.67 | 0.89 |
| 7.Southeast Basin   | 0.61 | 0.93  | 0.73 | 0.69 |
| 8.Southwest Basin   | 0.42 | 0.84  | 0.55 | 0.56 |
| 9.Continental Basin | 0.78 | 0.18  | 0.28 | 0.85 |
| Mainland China      | 0.95 | 0.07  | 0.45 | 0.96 |

**Table S26.** Accuracy metrics for the KED\_AP interpolation method across the nine major river basins for the LDLR

| Region                           | NSE  | PBIAS (%) | RMSE(mm/hr) | KGE  |
|----------------------------------|------|-----------|-------------|------|
| 1.Songhua and Liaohe River Basin | 0.71 | 0.97      | 0.66        | 0.77 |
| 2.Haihe River Basin              | 0.67 | -0.56     | 1.41        | 0.73 |
| 3.Huaihe River Basin             | 0.9  | 0.35      | 1.36        | 0.9  |
| 4.Yellow River Basin             | 0.56 | -0.15     | 1.58        | 0.65 |
| 5.Yangtze River Basin            | 0.64 | -0.04     | 1.64        | 0.71 |
| 6.Pearl River Basin              | 0.72 | 0.37      | 2.12        | 0.77 |
| 7.Southeast Basin                | 0.48 | 0.75      | 2.16        | 0.52 |
| 8.Southwest Basin                | 0.2  | -0.69     | 1.48        | 0.21 |
| 9.Continental Basin              | 0.31 | -0.63     | 1.09        | 0.48 |
| Mainland China                   | 0.82 | 0.05      | 1.6         | 0.87 |

**Table S27.** Accuracy metrics for the GB machine learning method across the nine major river basins for the SDSR

| Region                           | NSE  | PBIAS (%) | RMSE(mm/hr) | KGE  |
|----------------------------------|------|-----------|-------------|------|
| 1.Songhua and Liaohe River Basin | 0.77 | -0.78     | 3.26        | 0.8  |
| 2.Haihe River Basin              | 0.87 | -0.23     | 3.52        | 0.91 |
| 3.Huaihe River Basin             | 0.94 | -1.36     | 4.74        | 0.94 |
| 4.Yellow River Basin             | 0.82 | -0.14     | 4.26        | 0.86 |
| 5.Yangtze River Basin            | 0.78 | 0.51      | 4.55        | 0.82 |

|                     |       |       |      |      |
|---------------------|-------|-------|------|------|
| 6.Pearl River Basin | 0.69  | -1.02 | 5.72 | 0.81 |
| 7.Southeast Basin   | 0.39  | 0.86  | 4.33 | 0.49 |
| 8.Southwest Basin   | -0.23 | -1.72 | 3.99 | 0.18 |
| 9.Continental Basin | 0.75  | 1.43  | 2.86 | 0.82 |
| Mainland China      | 0.92  | -0.01 | 4.34 | 0.94 |

**Table S28.** Accuracy metrics for the GB machine learning method across the nine major river basins for the SDLR

| Region                           | NSE  | PBIAS (%) | RMSE(mm/hr) | KGE  |
|----------------------------------|------|-----------|-------------|------|
| 1.Songhua and Liaohe River Basin | 0.68 | -1.18     | 7.9         | 0.71 |
| 2.Haihe River Basin              | 0.79 | 0.48      | 13.18       | 0.82 |
| 3.Huaihe River Basin             | 0.91 | -0.45     | 12.24       | 0.91 |
| 4.Yellow River Basin             | 0.67 | -0.36     | 14.87       | 0.74 |
| 5.Yangtze River Basin            | 0.66 | 1.07      | 13.57       | 0.75 |
| 6.Pearl River Basin              | 0.68 | -1.54     | 15.23       | 0.77 |
| 7.Southeast Basin                | 0.57 | 0.66      | 13.51       | 0.63 |
|                                  | -    |           |             |      |
| 8.Southwest Basin                | 0.27 | -4.19     | 14.7        | 0.12 |
| 9.Continental Basin              | 0.4  | 0.49      | 9.93        | 0.52 |
| Mainland China                   | 0.83 | 0.1       | 13.3        | 0.87 |

**Table S29.** Accuracy metrics for the GB machine learning method across the nine major river basins for the LDSR

| Region                           | NSE  | PBIAS (%) | RMSE(mm/hr) | KGE  |
|----------------------------------|------|-----------|-------------|------|
| 1.Songhua and Liaohe River Basin | 0.87 | 2.39      | 0.22        | 0.92 |
| 2.Haihe River Basin              | 0.92 | -0.07     | 0.22        | 0.96 |
| 3.Huaihe River Basin             | 0.96 | -0.7      | 0.39        | 0.94 |
| 4.Yellow River Basin             | 0.83 | 0.28      | 0.39        | 0.91 |

|                        |      |       |      |      |
|------------------------|------|-------|------|------|
| 5. Yangtze River Basin | 0.88 | 0.08  | 0.42 | 0.93 |
| 6. Pearl River Basin   | 0.83 | -0.83 | 0.77 | 0.89 |
| 7. Southeast Basin     | 0.7  | -0.39 | 0.63 | 0.75 |
| 8. Southwest Basin     | 0.46 | -1.64 | 0.53 | 0.74 |
| 9. Continental Basin   | 0.86 | 0.74  | 0.23 | 0.9  |
| Mainland China         | 0.95 | -0.08 | 0.44 | 0.96 |

**Table S30.** Accuracy metrics for the GB machine learning method across the nine major river basins for the LDLR

| Region                            | NS   |           | RMSE(mm/hr) |      |
|-----------------------------------|------|-----------|-------------|------|
|                                   | E    | PBIAS (%) | )           | KGE  |
| 1. Songhua and Liaohe River Basin | 0.68 | 3.94      | 0.69        | 0.81 |
| 2. Haihe River Basin              | 0.77 | -0.17     | 1.16        | 0.82 |
| 3. Huaihe River Basin             | 0.92 | -0.09     | 1.23        | 0.91 |
| 4. Yellow River Basin             | 0.61 | -0.06     | 1.48        | 0.73 |
| 5. Yangtze River Basin            | 0.77 | 0.47      | 1.3         | 0.85 |
| 6. Pearl River Basin              | 0.79 | -1.11     | 1.88        | 0.85 |
| 7. Southeast Basin                | 0.68 | -0.85     | 1.7         | 0.75 |
| -                                 | -    | -         | -           | -    |
| 8. Southwest Basin                | 0.08 | -3.37     | 1.72        | 0.39 |
| 9. Continental Basin              | 0.5  | -0.31     | 0.93        | 0.63 |
| Mainland China                    | 0.88 | -0.05     | 1.36        | 0.91 |

**Table S31.** Optimal regionalization methods for developed IDF curves with a spatial resolution of  $0.1^\circ \times 0.1^\circ$  based on CHM\_PRE.

|           | 2 years    | 5 years | 10 years   | 20 years | 50 years | 100 years | 200 years | 500 years | 1000 years |
|-----------|------------|---------|------------|----------|----------|-----------|-----------|-----------|------------|
| <b>1h</b> | KED_AP     | KED_AP  | KED_DEM+AP | KED_AP   | GB       | GB        | GB        | GB        | GB         |
| <b>2h</b> | KED_AP     | KED_AP  | KED_AP     | GB       | GB       | GB        | GB        | GB        | GB         |
| <b>3h</b> | KED_DEM+AP | KED_AP  | KED_AP     | GB       | GB       | GB        | GB        | GB        | GB         |
| <b>4h</b> | KED_DEM+AP | KED_AP  | GB         | GB       | GB       | GB        | GB        | GB        | GB         |
| <b>5h</b> | KED_AP     | GB      | GB         | GB       | GB       | GB        | GB        | GB        | LR         |
| <b>6h</b> | KED_AP     | KED_AP  | GB         | GB       | GB       | GB        | GB        | GB        | LR         |

|            |            |        |     |     |     |    |     |     |     |
|------------|------------|--------|-----|-----|-----|----|-----|-----|-----|
| <b>7h</b>  | KED_AP     | GB     | GB  | GB  | GB  | GB | GB  | GB  | GB  |
| <b>8h</b>  | KED_AP     | GB     | GB  | GB  | GB  | GB | GB  | LR  | LR  |
| <b>9h</b>  | KED_AP     | GB     | GB  | GB  | GB  | GB | GB  | LR  | MLP |
| <b>10h</b> | KED_AP     | KED_AP | GB  | GB  | GB  | GB | GB  | GB  | LR  |
| <b>11h</b> | GB         | GB     | GB  | GB  | GB  | GB | LR  | LR  | GB  |
| <b>12h</b> | KED_AP     | KED_AP | GB  | GB  | GB  | GB | GB  | LR  | GB  |
| <b>13h</b> | KED_AP     | GB     | GB  | GB  | GB  | GB | LR  | LR  | MLP |
| <b>14h</b> | GB         | GB     | GB  | GB  | GB  | GB | GB  | MLP | LR  |
| <b>15h</b> | KED_AP     | GB     | GB  | GB  | GB  | GB | GB  | GB  | GB  |
| <b>16h</b> | GB         | GB     | GB  | GB  | GB  | GB | MLP | GB  | MLP |
| <b>17h</b> | GB         | GB     | GB  | GB  | GB  | GB | GB  | LR  | MLP |
| <b>18h</b> | GB         | GB     | GB  | GB  | GB  | GB | GB  | GB  | MLP |
| <b>19h</b> | GB         | KED_AP | GB  | MLP | GB  | GB | LR  | GB  | MLP |
| <b>20h</b> | KED_AP     | GB     | GB  | GB  | GB  | GB | GB  | MLP | GB  |
| <b>21h</b> | KED_AP     | KED_AP | GB  | GB  | GB  | GB | GB  | LR  | MLP |
| <b>22h</b> | KED_DEM+AP | GB     | GB  | GB  | GB  | GB | MLP | GB  | GB  |
| <b>23h</b> | KED_DEM+AP | GB     | MLP | MLP | GB  | GB | GB  | MLP | GB  |
| <b>24h</b> | KED_AP     | GB     | MLP | MLP | GB  | GB | GB  | GB  | MLP |
| <b>36h</b> | KED_AP     | MLP    | GB  | MLP | GB  | GB | MLP | MLP | MLP |
| <b>48h</b> | KED_AP     | RF     | MLP | MLP | GB  | GB | GB  | MLP | MLP |
| <b>72h</b> | KED_AP     | KED_AP | RF  | MLP | MLP | GB | MLP | GB  | MLP |

**Table S32.** Nash-Sutcliffe Efficiency for developed IDF curves with a spatial resolution of  $0.1^\circ \times 0.1^\circ$  based on CHM\_PRE.

|            | <b>2</b>     | <b>5</b>     | <b>10</b>    | <b>20</b>    | <b>50</b>    | <b>100</b>   | <b>200</b>   | <b>500</b>   | <b>1000</b>  |
|------------|--------------|--------------|--------------|--------------|--------------|--------------|--------------|--------------|--------------|
|            | <b>years</b> |
| <b>1h</b>  | 0.95         | 0.94         | 0.93         | 0.90         | 0.87         | 0.83         | 0.79         | 0.71         | 0.66         |
| <b>2h</b>  | 0.95         | 0.94         | 0.94         | 0.91         | 0.88         | 0.85         | 0.81         | 0.74         | 0.67         |
| <b>3h</b>  | 0.95         | 0.94         | 0.93         | 0.92         | 0.89         | 0.86         | 0.81         | 0.74         | 0.68         |
| <b>4h</b>  | 0.95         | 0.94         | 0.93         | 0.92         | 0.89         | 0.86         | 0.82         | 0.75         | 0.68         |
| <b>5h</b>  | 0.95         | 0.95         | 0.94         | 0.93         | 0.90         | 0.86         | 0.82         | 0.75         | 0.67         |
| <b>6h</b>  | 0.95         | 0.94         | 0.94         | 0.93         | 0.90         | 0.86         | 0.82         | 0.75         | 0.67         |
| <b>7h</b>  | 0.95         | 0.95         | 0.94         | 0.93         | 0.90         | 0.86         | 0.82         | 0.75         | 0.68         |
| <b>8h</b>  | 0.95         | 0.95         | 0.94         | 0.93         | 0.90         | 0.86         | 0.82         | 0.74         | 0.68         |
| <b>9h</b>  | 0.95         | 0.95         | 0.94         | 0.93         | 0.90         | 0.87         | 0.82         | 0.75         | 0.70         |
| <b>10h</b> | 0.95         | 0.95         | 0.94         | 0.93         | 0.90         | 0.87         | 0.82         | 0.75         | 0.68         |
| <b>11h</b> | 0.95         | 0.95         | 0.94         | 0.93         | 0.90         | 0.87         | 0.82         | 0.75         | 0.69         |
| <b>12h</b> | 0.95         | 0.95         | 0.94         | 0.93         | 0.90         | 0.87         | 0.83         | 0.75         | 0.69         |
| <b>13h</b> | 0.95         | 0.95         | 0.94         | 0.93         | 0.90         | 0.87         | 0.82         | 0.75         | 0.71         |
| <b>14h</b> | 0.96         | 0.95         | 0.94         | 0.93         | 0.90         | 0.87         | 0.83         | 0.76         | 0.69         |
| <b>15h</b> | 0.95         | 0.95         | 0.94         | 0.93         | 0.90         | 0.87         | 0.83         | 0.76         | 0.69         |
| <b>16h</b> | 0.96         | 0.95         | 0.94         | 0.93         | 0.91         | 0.87         | 0.83         | 0.76         | 0.71         |
| <b>17h</b> | 0.95         | 0.95         | 0.94         | 0.93         | 0.91         | 0.87         | 0.83         | 0.75         | 0.71         |
| <b>18h</b> | 0.96         | 0.95         | 0.94         | 0.93         | 0.91         | 0.87         | 0.83         | 0.76         | 0.71         |
| <b>19h</b> | 0.95         | 0.95         | 0.94         | 0.93         | 0.91         | 0.87         | 0.83         | 0.76         | 0.71         |
| <b>20h</b> | 0.95         | 0.95         | 0.94         | 0.93         | 0.91         | 0.87         | 0.83         | 0.77         | 0.69         |

|            |      |      |      |      |      |      |      |      |      |
|------------|------|------|------|------|------|------|------|------|------|
| <b>21h</b> | 0.95 | 0.95 | 0.94 | 0.93 | 0.91 | 0.87 | 0.83 | 0.76 | 0.71 |
| <b>22h</b> | 0.95 | 0.95 | 0.94 | 0.93 | 0.91 | 0.87 | 0.84 | 0.76 | 0.69 |
| <b>23h</b> | 0.95 | 0.95 | 0.94 | 0.93 | 0.91 | 0.88 | 0.83 | 0.77 | 0.69 |
| <b>24h</b> | 0.95 | 0.95 | 0.94 | 0.93 | 0.90 | 0.88 | 0.83 | 0.76 | 0.71 |
| <b>36h</b> | 0.95 | 0.95 | 0.94 | 0.93 | 0.91 | 0.88 | 0.84 | 0.78 | 0.72 |
| <b>48h</b> | 0.95 | 0.95 | 0.94 | 0.93 | 0.91 | 0.87 | 0.84 | 0.78 | 0.72 |
| <b>72h</b> | 0.95 | 0.94 | 0.94 | 0.93 | 0.91 | 0.88 | 0.85 | 0.77 | 0.73 |

**Table S33.** Percent Bias (%) for developed IDF curves with a spatial resolution of 0.1°×0.1° based on CHM\_PRE.

|            | <b>2 years</b> | <b>5 years</b> | <b>10 years</b> | <b>20 years</b> | <b>50 years</b> | <b>100 years</b> | <b>200 years</b> | <b>500 years</b> | <b>1000 years</b> |
|------------|----------------|----------------|-----------------|-----------------|-----------------|------------------|------------------|------------------|-------------------|
| <b>1h</b>  | 0.06           | 0.03           | -0.07           | -0.02           | 0.10            | 0.11             | 0.06             | 0.20             | 0.05              |
| <b>2h</b>  | -0.02          | 0.05           | -0.07           | -0.01           | 0.04            | 0.00             | 0.04             | 0.23             | 0.36              |
| <b>3h</b>  | 0.07           | 0.05           | 0.01            | -0.01           | 0.01            | -0.02            | 0.01             | 0.12             | 0.22              |
| <b>4h</b>  | 0.09           | 0.07           | -0.04           | -0.06           | -0.02           | -0.03            | -0.02            | 0.11             | 0.20              |
| <b>5h</b>  | -0.05          | -0.09          | -0.09           | -0.05           | -0.02           | -0.01            | -0.04            | 0.12             | 0.12              |
| <b>6h</b>  | 0.00           | 0.03           | -0.10           | -0.09           | -0.03           | -0.01            | 0.07             | 0.05             | 0.12              |
| <b>7h</b>  | -0.01          | -0.09          | -0.04           | -0.08           | -0.05           | -0.03            | 0.03             | 0.04             | 0.12              |
| <b>8h</b>  | 0.03           | -0.12          | -0.01           | -0.05           | -0.02           | -0.04            | 0.02             | 0.07             | 0.11              |
| <b>9h</b>  | 0.02           | -0.03          | -0.10           | -0.07           | -0.03           | 0.04             | -0.01            | 0.07             | -0.24             |
| <b>10h</b> | -0.03          | -0.01          | -0.07           | -0.07           | -0.02           | -0.01            | 0.06             | 0.10             | 0.11              |
| <b>11h</b> | -0.11          | -0.07          | -0.10           | -0.08           | -0.08           | 0.03             | 0.03             | 0.07             | 0.09              |
| <b>12h</b> | 0.02           | 0.00           | -0.09           | -0.07           | -0.08           | -0.01            | 0.03             | 0.07             | 0.03              |
| <b>13h</b> | 0.01           | -0.10          | -0.12           | -0.10           | -0.06           | 0.04             | 0.03             | 0.06             | -0.06             |
| <b>14h</b> | -0.07          | -0.04          | -0.14           | -0.06           | -0.06           | 0.04             | -0.03            | -0.06            | 0.10              |
| <b>15h</b> | 0.03           | -0.05          | -0.13           | -0.10           | -0.07           | 0.03             | 0.04             | 0.01             | -0.01             |
| <b>16h</b> | -0.05          | -0.05          | -0.15           | -0.12           | -0.05           | -0.01            | -0.08            | 0.05             | -0.24             |
| <b>17h</b> | -0.08          | -0.08          | -0.07           | -0.09           | 0.00            | -0.01            | 0.03             | 0.06             | -0.27             |
| <b>18h</b> | -0.06          | -0.08          | -0.14           | -0.10           | -0.09           | -0.01            | 0.00             | 0.05             | -0.12             |
| <b>19h</b> | -0.07          | 0.00           | -0.11           | 0.01            | -0.03           | -0.05            | 0.02             | -0.02            | 0.16              |
| <b>20h</b> | 0.05           | -0.10          | -0.07           | -0.07           | -0.07           | -0.03            | 0.04             | -0.01            | -0.02             |
| <b>21h</b> | 0.03           | 0.02           | -0.10           | -0.08           | -0.04           | 0.00             | 0.03             | 0.05             | -0.11             |
| <b>22h</b> | -0.03          | -0.07          | -0.06           | -0.10           | 0.01            | -0.02            | 0.09             | -0.01            | 0.04              |
| <b>23h</b> | 0.01           | -0.07          | 0.04            | -0.03           | -0.03           | 0.00             | -0.03            | -0.10            | 0.02              |
| <b>24h</b> | 0.01           | -0.07          | 0.02            | 0.02            | -0.02           | -0.05            | -0.01            | -0.03            | -0.23             |
| <b>36h</b> | 0.02           | 0.02           | -0.10           | 0.12            | -0.04           | -0.04            | -0.10            | -0.23            | -0.12             |
| <b>48h</b> | 0.08           | 0.01           | -0.25           | -0.35           | -0.04           | -0.06            | -0.04            | -0.16            | -0.24             |
| <b>72h</b> | 0.05           | 0.06           | 0.00            | 0.00            | -0.08           | -0.02            | -0.14            | -0.05            | 0.12              |

**Table S34.** Root Mean Square Error for developed IDF curves with a spatial resolution of 0.1°×0.1° based on CHM\_PRE.

|  | <b>2 years</b> | <b>5 years</b> | <b>10 years</b> | <b>20 years</b> | <b>50 years</b> | <b>100 years</b> | <b>200 years</b> | <b>500 years</b> | <b>1000 years</b> |
|--|----------------|----------------|-----------------|-----------------|-----------------|------------------|------------------|------------------|-------------------|
|--|----------------|----------------|-----------------|-----------------|-----------------|------------------|------------------|------------------|-------------------|

|            |      |      |      |      |       |       |       |       |       |
|------------|------|------|------|------|-------|-------|-------|-------|-------|
| <b>1h</b>  | 2.57 | 3.79 | 4.99 | 6.94 | 10.02 | 13.29 | 17.71 | 26.10 | 34.68 |
| <b>2h</b>  | 1.68 | 2.46 | 3.22 | 4.39 | 6.32  | 8.49  | 11.32 | 16.79 | 22.71 |
| <b>3h</b>  | 1.36 | 1.92 | 2.53 | 3.30 | 4.79  | 6.43  | 8.62  | 12.76 | 17.20 |
| <b>4h</b>  | 1.10 | 1.60 | 2.09 | 2.70 | 3.91  | 5.25  | 7.05  | 10.43 | 14.06 |
| <b>5h</b>  | 0.94 | 1.38 | 1.76 | 2.27 | 3.31  | 4.47  | 6.04  | 8.91  | 12.27 |
| <b>6h</b>  | 0.84 | 1.22 | 1.54 | 1.98 | 2.90  | 3.91  | 5.30  | 7.82  | 10.71 |
| <b>7h</b>  | 0.75 | 1.07 | 1.36 | 1.76 | 2.59  | 3.50  | 4.70  | 6.98  | 9.41  |
| <b>8h</b>  | 0.68 | 0.97 | 1.24 | 1.59 | 2.35  | 3.17  | 4.25  | 6.40  | 8.61  |
| <b>9h</b>  | 0.62 | 0.89 | 1.13 | 1.45 | 2.13  | 2.90  | 3.91  | 5.85  | 7.62  |
| <b>10h</b> | 0.58 | 0.83 | 1.05 | 1.34 | 1.99  | 2.69  | 3.62  | 5.32  | 7.26  |
| <b>11h</b> | 0.53 | 0.77 | 0.97 | 1.24 | 1.85  | 2.49  | 3.40  | 5.01  | 6.69  |
| <b>12h</b> | 0.50 | 0.74 | 0.91 | 1.17 | 1.72  | 2.33  | 3.14  | 4.69  | 6.27  |
| <b>13h</b> | 0.47 | 0.68 | 0.85 | 1.11 | 1.62  | 2.19  | 2.99  | 4.41  | 5.73  |
| <b>14h</b> | 0.44 | 0.64 | 0.81 | 1.05 | 1.54  | 2.06  | 2.79  | 4.07  | 5.61  |
| <b>15h</b> | 0.42 | 0.61 | 0.77 | 1.00 | 1.47  | 1.96  | 2.65  | 3.92  | 5.26  |
| <b>16h</b> | 0.40 | 0.59 | 0.73 | 0.96 | 1.38  | 1.87  | 2.52  | 3.72  | 4.88  |
| <b>17h</b> | 0.39 | 0.56 | 0.70 | 0.90 | 1.31  | 1.79  | 2.41  | 3.59  | 4.67  |
| <b>18h</b> | 0.37 | 0.54 | 0.67 | 0.87 | 1.26  | 1.70  | 2.30  | 3.42  | 4.45  |
| <b>19h</b> | 0.36 | 0.52 | 0.65 | 0.87 | 1.21  | 1.63  | 2.24  | 3.27  | 4.28  |
| <b>20h</b> | 0.35 | 0.50 | 0.63 | 0.81 | 1.16  | 1.59  | 2.12  | 3.07  | 4.23  |
| <b>21h</b> | 0.34 | 0.49 | 0.61 | 0.78 | 1.13  | 1.52  | 2.04  | 3.05  | 3.96  |
| <b>22h</b> | 0.33 | 0.47 | 0.59 | 0.75 | 1.08  | 1.46  | 1.95  | 2.93  | 3.95  |
| <b>23h</b> | 0.32 | 0.46 | 0.59 | 0.74 | 1.05  | 1.41  | 1.91  | 2.77  | 3.82  |
| <b>24h</b> | 0.31 | 0.44 | 0.56 | 0.72 | 1.03  | 1.36  | 1.85  | 2.74  | 3.56  |
| <b>36h</b> | 0.23 | 0.33 | 0.42 | 0.53 | 0.75  | 1.01  | 1.34  | 1.96  | 2.61  |
| <b>48h</b> | 0.19 | 0.28 | 0.33 | 0.43 | 0.61  | 0.82  | 1.09  | 1.56  | 2.09  |
| <b>72h</b> | 0.14 | 0.21 | 0.26 | 0.32 | 0.45  | 0.61  | 0.78  | 1.18  | 1.53  |

**Table S35.** Kling-Gupta Efficiency for developed IDF curves with a spatial resolution of  $0.1^\circ \times 0.1^\circ$  based on CHM\_PRE.

|            | <b>2 years</b> | <b>5 years</b> | <b>10 years</b> | <b>20 years</b> | <b>50 years</b> | <b>100 years</b> | <b>200 years</b> | <b>500 years</b> | <b>1000 years</b> |
|------------|----------------|----------------|-----------------|-----------------|-----------------|------------------|------------------|------------------|-------------------|
| <b>1h</b>  | 0.96           | 0.96           | 0.95            | 0.93            | 0.90            | 0.87             | 0.84             | 0.78             | 0.73              |
| <b>2h</b>  | 0.97           | 0.96           | 0.95            | 0.93            | 0.91            | 0.89             | 0.85             | 0.80             | 0.75              |
| <b>3h</b>  | 0.97           | 0.96           | 0.95            | 0.94            | 0.92            | 0.89             | 0.86             | 0.81             | 0.76              |
| <b>4h</b>  | 0.96           | 0.96           | 0.95            | 0.94            | 0.92            | 0.90             | 0.86             | 0.81             | 0.76              |
| <b>5h</b>  | 0.97           | 0.96           | 0.95            | 0.94            | 0.92            | 0.90             | 0.86             | 0.81             | 0.76              |
| <b>6h</b>  | 0.96           | 0.96           | 0.95            | 0.94            | 0.92            | 0.90             | 0.87             | 0.81             | 0.77              |
| <b>7h</b>  | 0.96           | 0.96           | 0.95            | 0.94            | 0.92            | 0.90             | 0.87             | 0.82             | 0.77              |
| <b>8h</b>  | 0.97           | 0.96           | 0.96            | 0.95            | 0.92            | 0.90             | 0.87             | 0.82             | 0.77              |
| <b>9h</b>  | 0.96           | 0.96           | 0.96            | 0.95            | 0.93            | 0.90             | 0.87             | 0.82             | 0.78              |
| <b>10h</b> | 0.96           | 0.96           | 0.96            | 0.95            | 0.93            | 0.90             | 0.87             | 0.82             | 0.77              |
| <b>11h</b> | 0.97           | 0.96           | 0.96            | 0.95            | 0.93            | 0.90             | 0.87             | 0.82             | 0.77              |
| <b>12h</b> | 0.97           | 0.96           | 0.96            | 0.95            | 0.93            | 0.91             | 0.87             | 0.82             | 0.77              |

|            |      |      |      |      |      |      |      |      |      |
|------------|------|------|------|------|------|------|------|------|------|
| <b>13h</b> | 0.97 | 0.96 | 0.96 | 0.95 | 0.93 | 0.91 | 0.87 | 0.82 | 0.78 |
| <b>14h</b> | 0.97 | 0.96 | 0.96 | 0.95 | 0.93 | 0.91 | 0.87 | 0.84 | 0.78 |
| <b>15h</b> | 0.97 | 0.96 | 0.96 | 0.95 | 0.93 | 0.91 | 0.88 | 0.82 | 0.77 |
| <b>16h</b> | 0.97 | 0.96 | 0.96 | 0.95 | 0.93 | 0.91 | 0.88 | 0.82 | 0.79 |
| <b>17h</b> | 0.97 | 0.96 | 0.96 | 0.95 | 0.93 | 0.91 | 0.88 | 0.83 | 0.79 |
| <b>18h</b> | 0.97 | 0.96 | 0.96 | 0.95 | 0.93 | 0.91 | 0.88 | 0.82 | 0.79 |
| <b>19h</b> | 0.97 | 0.96 | 0.96 | 0.95 | 0.93 | 0.91 | 0.88 | 0.82 | 0.79 |
| <b>20h</b> | 0.97 | 0.96 | 0.96 | 0.95 | 0.93 | 0.91 | 0.88 | 0.83 | 0.78 |
| <b>21h</b> | 0.96 | 0.96 | 0.96 | 0.95 | 0.93 | 0.91 | 0.88 | 0.83 | 0.79 |
| <b>22h</b> | 0.96 | 0.96 | 0.96 | 0.95 | 0.93 | 0.91 | 0.89 | 0.83 | 0.78 |
| <b>23h</b> | 0.97 | 0.96 | 0.96 | 0.95 | 0.93 | 0.91 | 0.88 | 0.84 | 0.78 |
| <b>24h</b> | 0.96 | 0.96 | 0.96 | 0.94 | 0.93 | 0.91 | 0.88 | 0.83 | 0.79 |
| <b>36h</b> | 0.97 | 0.96 | 0.96 | 0.95 | 0.93 | 0.91 | 0.89 | 0.85 | 0.79 |
| <b>48h</b> | 0.97 | 0.96 | 0.97 | 0.96 | 0.93 | 0.91 | 0.88 | 0.84 | 0.79 |
| <b>72h</b> | 0.96 | 0.96 | 0.95 | 0.94 | 0.93 | 0.91 | 0.90 | 0.83 | 0.80 |

**Table S36.** Optimal regionalization methods for developed IDF curves with a spatial resolution of  $0.5^\circ \times 0.5^\circ$  based on CGDPP.

|            | <b>2 years</b> | <b>5 years</b> | <b>10 years</b> | <b>20 years</b> | <b>50 years</b> | <b>100 years</b> | <b>200 years</b> | <b>500 years</b> | <b>1000 years</b> |
|------------|----------------|----------------|-----------------|-----------------|-----------------|------------------|------------------|------------------|-------------------|
| <b>1h</b>  | KED_AP         | KED_AP         | KED_DEM+AP      | KED_AP          | KED_AP          | KED_AP           | KED_DEM+AP       | KED_DEM+AP       | GB                |
| <b>2h</b>  | KED_AP         | KED_AP         | KED_AP          | KED_AP          | KED_AP          | KED_AP           | KED_DEM+AP       | GB               | GB                |
| <b>3h</b>  | KED_DEM+AP     | KED_AP         | KED_AP          | KED_DEM+AP      | KED_AP          | KED_AP           | KED_DEM+AP       | GB               | GB                |
| <b>4h</b>  | KED_DEM+AP     | KED_AP         | KED_AP          | KED_AP          | KED_AP          | KED_AP           | GB               | GB               | GB                |
| <b>5h</b>  | KED_AP         | KED_DEM+AP     | KED_DEM+AP      | KED_AP          | KED_AP          | KED_AP           | GB               | GB               | GB                |
| <b>6h</b>  | KED_AP         | KED_AP         | KED_DEM+AP      | KED_DEM+AP      | KED_AP          | GB               | GB               | GB               | GB                |
| <b>7h</b>  | KED_AP         | KED_AP         | KED_DEM+AP      | KED_AP          | KED_AP          | GB               | GB               | MLP              | MLP               |
| <b>8h</b>  | KED_AP         | KED_AP         | KED_DEM+AP      | KED_DEM+AP      | KED_AP          | KED_AP           | GB               | MLP              | MLP               |
| <b>9h</b>  | KED_AP         | KED_DEM+AP     | KED_AP          | KED_AP          | KED_AP          | KED_DEM+AP       | GB               | MLP              | GB                |
| <b>10h</b> | KED_AP         | KED_AP         | KED_AP          | KED_DEM+AP      | KED_AP          | GB               | GB               | MLP              | MLP               |
| <b>11h</b> | KED_DEM+AP     | KED_DEM+AP     | KED_AP          | KED_DEM+AP      | GB              | KED_AP           | MLP              | MLP              | MLP               |
| <b>12h</b> | KED_AP         | KED_AP         | KED_AP          | KED_AP          | KED_AP          | KED_AP           | MLP              | MLP              | MLP               |
| <b>13h</b> | KED_AP         | KED_DEM+AP     | KED_AP          | KED_AP          | KED_AP          | KED_AP           | GB               | MLP              | GB                |
| <b>14h</b> | KED_AP         | KED_AP         | KED_DEM+AP      | KED_DEM+AP      | KED_AP          | KED_AP           | MLP              | MLP              | MLP               |
| <b>15h</b> | KED_AP         | KED_DEM+AP     | KED_AP          | KED_AP          | KED_DEM+AP      | GB               | MLP              | MLP              | MLP               |
| <b>16h</b> | KED_AP         | KED_AP         | KED_AP          | KED_AP          | KED_AP          | GB               | MLP              | MLP              | MLP               |
| <b>17h</b> | KED_AP         | KED_AP         | KED_AP          | KED_AP          | KED_AP          | KED_AP           | MLP              | MLP              | MLP               |
| <b>18h</b> | KED_AP         | KED_AP         | KED_AP          | KED_AP          | KED_AP          | KED_AP           | MLP              | MLP              | MLP               |
| <b>19h</b> | KED_AP         | KED_AP         | KED_AP          | KED_DEM+AP      | MLP             | GB               | MLP              | MLP              | MLP               |
| <b>20h</b> | KED_AP         | KED_AP         | KED_AP          | KED_AP          | MLP             | MLP              | GB               | MLP              | MLP               |
| <b>21h</b> | KED_AP         | KED_AP         | KED_AP          | KED_DEM+AP      | KED_DEM+AP      | MLP              | MLP              | MLP              | MLP               |
| <b>22h</b> | KED_DEM+AP     | KED_DEM+AP     | KED_AP          | KED_AP          | KED_AP          | GB               | MLP              | MLP              | MLP               |
| <b>23h</b> | KED_DEM+AP     | KED_DEM+AP     | KED_AP          | KED_AP          | MLP             | MLP              | GB               | MLP              | MLP               |
| <b>24h</b> | KED_AP         | KED_AP         | KED_DEM+AP      | KED_AP          | KED_AP          | GB               | MLP              | MLP              | MLP               |
| <b>36h</b> | KED_AP         | KED_DEM+AP     | KED_DEM+AP      | KED_AP          | MLP             | MLP              | MLP              | MLP              | MLP               |
| <b>48h</b> | KED_AP         | KED_AP         | KED_AP          | KED_AP          | KED_AP          | GB               | GB               | MLP              | MLP               |

**Table S37.** Nash-Sutcliffe Efficiency for developed IDF curves with a spatial resolution of 0.5°×0.5° based on CGDPP.

|            | <b>2</b>     | <b>5</b>     | <b>10</b>    | <b>20</b>    | <b>50</b>    | <b>100</b>   | <b>200</b>   | <b>500</b>   | <b>1000</b>  |
|------------|--------------|--------------|--------------|--------------|--------------|--------------|--------------|--------------|--------------|
|            | <b>years</b> |
| <b>1h</b>  | 0.95         | 0.94         | 0.93         | 0.90         | 0.85         | 0.79         | 0.71         | 0.61         | 0.54         |
| <b>2h</b>  | 0.95         | 0.94         | 0.94         | 0.91         | 0.86         | 0.80         | 0.73         | 0.64         | 0.55         |
| <b>3h</b>  | 0.95         | 0.94         | 0.93         | 0.91         | 0.86         | 0.80         | 0.73         | 0.65         | 0.56         |
| <b>4h</b>  | 0.95         | 0.94         | 0.93         | 0.91         | 0.86         | 0.81         | 0.74         | 0.65         | 0.57         |
| <b>5h</b>  | 0.95         | 0.94         | 0.93         | 0.91         | 0.86         | 0.81         | 0.75         | 0.65         | 0.57         |
| <b>6h</b>  | 0.95         | 0.94         | 0.93         | 0.91         | 0.87         | 0.81         | 0.75         | 0.65         | 0.58         |
| <b>7h</b>  | 0.95         | 0.94         | 0.93         | 0.91         | 0.87         | 0.81         | 0.75         | 0.65         | 0.57         |
| <b>8h</b>  | 0.95         | 0.94         | 0.93         | 0.91         | 0.86         | 0.82         | 0.75         | 0.65         | 0.57         |
| <b>9h</b>  | 0.95         | 0.94         | 0.93         | 0.91         | 0.87         | 0.81         | 0.75         | 0.65         | 0.59         |
| <b>10h</b> | 0.95         | 0.95         | 0.93         | 0.91         | 0.87         | 0.81         | 0.75         | 0.65         | 0.58         |
| <b>11h</b> | 0.95         | 0.94         | 0.93         | 0.91         | 0.86         | 0.82         | 0.75         | 0.66         | 0.58         |
| <b>12h</b> | 0.95         | 0.95         | 0.93         | 0.91         | 0.87         | 0.82         | 0.75         | 0.66         | 0.59         |
| <b>13h</b> | 0.95         | 0.94         | 0.93         | 0.91         | 0.87         | 0.82         | 0.76         | 0.66         | 0.59         |
| <b>14h</b> | 0.95         | 0.95         | 0.93         | 0.91         | 0.87         | 0.82         | 0.75         | 0.66         | 0.59         |
| <b>15h</b> | 0.95         | 0.94         | 0.94         | 0.92         | 0.86         | 0.82         | 0.76         | 0.66         | 0.59         |
| <b>16h</b> | 0.95         | 0.95         | 0.93         | 0.92         | 0.87         | 0.82         | 0.76         | 0.67         | 0.59         |
| <b>17h</b> | 0.95         | 0.95         | 0.94         | 0.92         | 0.87         | 0.82         | 0.76         | 0.67         | 0.59         |
| <b>18h</b> | 0.95         | 0.95         | 0.93         | 0.92         | 0.87         | 0.82         | 0.76         | 0.67         | 0.60         |
| <b>19h</b> | 0.95         | 0.95         | 0.94         | 0.91         | 0.86         | 0.82         | 0.76         | 0.67         | 0.60         |
| <b>20h</b> | 0.95         | 0.94         | 0.94         | 0.92         | 0.86         | 0.82         | 0.76         | 0.67         | 0.60         |
| <b>21h</b> | 0.95         | 0.95         | 0.93         | 0.91         | 0.87         | 0.82         | 0.76         | 0.68         | 0.60         |
| <b>22h</b> | 0.95         | 0.94         | 0.94         | 0.92         | 0.87         | 0.82         | 0.76         | 0.67         | 0.60         |
| <b>23h</b> | 0.95         | 0.94         | 0.93         | 0.92         | 0.86         | 0.82         | 0.77         | 0.68         | 0.60         |
| <b>24h</b> | 0.95         | 0.95         | 0.93         | 0.92         | 0.87         | 0.82         | 0.77         | 0.68         | 0.60         |
| <b>36h</b> | 0.95         | 0.94         | 0.93         | 0.92         | 0.87         | 0.83         | 0.78         | 0.69         | 0.61         |
| <b>48h</b> | 0.95         | 0.94         | 0.94         | 0.92         | 0.87         | 0.83         | 0.78         | 0.69         | 0.62         |
| <b>72h</b> | 0.95         | 0.94         | 0.92         | 0.92         | 0.88         | 0.83         | 0.78         | 0.70         | 0.62         |

**Table S38.** Percent Bias (%) for developed IDF curves with a spatial resolution of 0.5°×0.5° based on CGDPP.

|           | <b>2</b>     | <b>5</b>     | <b>10</b>    | <b>20</b>    | <b>50</b>    | <b>100</b>   | <b>200</b>   | <b>500</b>   | <b>1000</b>  |
|-----------|--------------|--------------|--------------|--------------|--------------|--------------|--------------|--------------|--------------|
|           | <b>years</b> |
| <b>1h</b> | 0.06         | 0.03         | -0.07        | -0.02        | 0.09         | -0.01        | 0.18         | 0.19         | 0.49         |
| <b>2h</b> | -0.02        | 0.05         | -0.07        | 0.07         | -0.02        | -0.04        | 0.17         | 0.32         | 0.45         |
| <b>3h</b> | 0.07         | 0.05         | 0.01         | 0.06         | 0.07         | -0.01        | 0.11         | 0.27         | 0.32         |
| <b>4h</b> | 0.09         | 0.07         | -0.02        | 0.05         | 0.02         | -0.01        | 0.18         | 0.28         | 0.31         |
| <b>5h</b> | -0.05        | 0.05         | 0.02         | 0.01         | 0.04         | 0.08         | 0.12         | 0.24         | 0.33         |
| <b>6h</b> | 0.00         | 0.03         | 0.00         | -0.04        | -0.04        | 0.02         | 0.14         | 0.28         | 0.37         |

|            |       |       |       |       |       |       |       |       |       |
|------------|-------|-------|-------|-------|-------|-------|-------|-------|-------|
| <b>7h</b>  | -0.01 | 0.06  | 0.02  | 0.04  | 0.02  | 0.08  | 0.17  | -0.21 | -0.37 |
| <b>8h</b>  | 0.03  | -0.01 | 0.05  | 0.07  | 0.05  | -0.04 | 0.20  | -0.45 | -0.26 |
| <b>9h</b>  | 0.02  | 0.05  | -0.06 | -0.03 | -0.09 | -0.01 | 0.26  | -0.29 | 0.43  |
| <b>10h</b> | -0.03 | -0.01 | 0.01  | -0.01 | 0.06  | 0.15  | 0.23  | -0.29 | -0.29 |
| <b>11h</b> | 0.06  | -0.02 | 0.09  | -0.04 | 0.05  | 0.02  | -0.18 | 0.04  | -0.35 |
| <b>12h</b> | 0.02  | 0.00  | 0.05  | 0.09  | -0.05 | 0.00  | 0.06  | -0.23 | -0.44 |
| <b>13h</b> | 0.01  | 0.02  | 0.01  | 0.13  | 0.07  | -0.03 | 0.28  | -0.45 | 0.51  |
| <b>14h</b> | 0.06  | 0.07  | -0.02 | 0.04  | 0.00  | 0.00  | 0.04  | -0.10 | -0.21 |
| <b>15h</b> | 0.03  | 0.06  | 0.06  | 0.04  | 0.04  | 0.13  | -0.21 | 0.03  | -0.13 |
| <b>16h</b> | 0.00  | -0.06 | -0.03 | -0.03 | 0.09  | 0.15  | -0.10 | -0.12 | -0.23 |
| <b>17h</b> | 0.10  | 0.13  | -0.02 | 0.05  | -0.03 | -0.02 | -0.14 | -0.38 | -0.19 |
| <b>18h</b> | 0.04  | -0.02 | 0.07  | 0.03  | -0.01 | -0.03 | -0.01 | 0.09  | -0.23 |
| <b>19h</b> | 0.04  | 0.00  | 0.09  | 0.05  | -0.12 | 0.14  | -0.08 | -0.19 | -0.08 |
| <b>20h</b> | 0.05  | 0.00  | -0.03 | 0.11  | -0.07 | -0.11 | 0.30  | -0.23 | -0.27 |
| <b>21h</b> | 0.03  | 0.02  | -0.02 | 0.02  | 0.01  | 0.14  | -0.11 | -0.03 | -0.37 |
| <b>22h</b> | -0.03 | 0.01  | 0.02  | 0.06  | 0.11  | 0.19  | -0.12 | -0.19 | 0.11  |
| <b>23h</b> | 0.01  | 0.00  | 0.06  | 0.07  | -0.04 | 0.03  | 0.30  | -0.20 | -0.21 |
| <b>24h</b> | 0.01  | 0.07  | -0.02 | 0.05  | 0.04  | 0.15  | 0.05  | -0.15 | 0.17  |
| <b>36h</b> | 0.02  | 0.01  | 0.09  | -0.03 | -0.08 | 0.10  | -0.15 | 0.24  | 0.11  |
| <b>48h</b> | 0.08  | 0.10  | 0.06  | 0.05  | 0.01  | 0.19  | 0.27  | 0.00  | -0.25 |
| <b>72h</b> | 0.05  | 0.06  | 0.02  | 0.08  | 0.01  | -0.12 | 0.09  | 0.23  | -0.27 |

**Table S39.** Root Mean Square Error for developed IDF curves with a spatial resolution of 0.5°×0.5° based on CGDPP.

|            | <b>2 years</b> | <b>5 years</b> | <b>10 years</b> | <b>20 years</b> | <b>50 years</b> | <b>100 years</b> | <b>200 years</b> | <b>500 years</b> | <b>1000 years</b> |
|------------|----------------|----------------|-----------------|-----------------|-----------------|------------------|------------------|------------------|-------------------|
| <b>1h</b>  | 2.57           | 3.79           | 4.99            | 6.94            | 10.58           | 14.72            | 20.61            | 30.20            | 40.07             |
| <b>2h</b>  | 1.68           | 2.46           | 3.22            | 4.53            | 6.92            | 9.62             | 13.27            | 19.73            | 26.34             |
| <b>3h</b>  | 1.36           | 1.92           | 2.53            | 3.47            | 5.28            | 7.42             | 10.30            | 14.99            | 20.03             |
| <b>4h</b>  | 1.10           | 1.60           | 2.12            | 2.83            | 4.36            | 6.06             | 8.39             | 12.31            | 16.39             |
| <b>5h</b>  | 0.94           | 1.41           | 1.84            | 2.50            | 3.76            | 5.13             | 7.13             | 10.47            | 13.97             |
| <b>6h</b>  | 0.84           | 1.22           | 1.62            | 2.18            | 3.26            | 4.64             | 6.27             | 9.20             | 12.16             |
| <b>7h</b>  | 0.75           | 1.10           | 1.47            | 1.91            | 2.93            | 4.16             | 5.58             | 8.30             | 10.94             |
| <b>8h</b>  | 0.68           | 1.00           | 1.31            | 1.76            | 2.68            | 3.63             | 5.03             | 7.47             | 9.92              |
| <b>9h</b>  | 0.62           | 0.94           | 1.19            | 1.63            | 2.45            | 3.44             | 4.63             | 6.86             | 8.96              |
| <b>10h</b> | 0.58           | 0.83           | 1.11            | 1.55            | 2.27            | 3.18             | 4.28             | 6.33             | 8.30              |
| <b>11h</b> | 0.54           | 0.80           | 1.03            | 1.42            | 2.21            | 2.88             | 4.02             | 5.86             | 7.76              |
| <b>12h</b> | 0.50           | 0.74           | 0.96            | 1.31            | 1.96            | 2.69             | 3.81             | 5.45             | 7.23              |
| <b>13h</b> | 0.47           | 0.71           | 0.92            | 1.24            | 1.85            | 2.53             | 3.51             | 5.15             | 6.81              |
| <b>14h</b> | 0.45           | 0.66           | 0.86            | 1.19            | 1.75            | 2.41             | 3.35             | 4.89             | 6.45              |
| <b>15h</b> | 0.42           | 0.63           | 0.81            | 1.10            | 1.71            | 2.35             | 3.17             | 4.62             | 6.08              |
| <b>16h</b> | 0.41           | 0.60           | 0.79            | 1.05            | 1.58            | 2.23             | 3.00             | 4.37             | 5.79              |
| <b>17h</b> | 0.39           | 0.57           | 0.74            | 1.00            | 1.52            | 2.08             | 2.90             | 4.20             | 5.52              |
| <b>18h</b> | 0.37           | 0.55           | 0.72            | 0.96            | 1.46            | 1.99             | 2.75             | 4.01             | 5.29              |

|            |      |      |      |      |      |      |      |      |      |
|------------|------|------|------|------|------|------|------|------|------|
| <b>19h</b> | 0.36 | 0.52 | 0.68 | 0.95 | 1.47 | 1.96 | 2.64 | 3.87 | 5.08 |
| <b>20h</b> | 0.35 | 0.51 | 0.67 | 0.89 | 1.42 | 1.89 | 2.52 | 3.70 | 4.88 |
| <b>21h</b> | 0.34 | 0.49 | 0.65 | 0.87 | 1.33 | 1.84 | 2.44 | 3.54 | 4.66 |
| <b>22h</b> | 0.33 | 0.48 | 0.62 | 0.82 | 1.25 | 1.74 | 2.37 | 3.43 | 4.54 |
| <b>23h</b> | 0.32 | 0.48 | 0.61 | 0.79 | 1.29 | 1.70 | 2.25 | 3.30 | 4.39 |
| <b>24h</b> | 0.31 | 0.45 | 0.59 | 0.77 | 1.16 | 1.63 | 2.19 | 3.18 | 4.24 |
| <b>36h</b> | 0.23 | 0.35 | 0.45 | 0.58 | 0.89 | 1.20 | 1.59 | 2.32 | 3.08 |
| <b>48h</b> | 0.19 | 0.28 | 0.35 | 0.47 | 0.70 | 0.96 | 1.29 | 1.86 | 2.46 |
| <b>72h</b> | 0.14 | 0.21 | 0.29 | 0.36 | 0.53 | 0.71 | 0.94 | 1.36 | 1.81 |

**Table S40.** Kling-Gupta Efficiency for developed IDF curves with a spatial resolution of 0.5°×0.5° based on CGDPP.

|            | <b>2 years</b> | <b>5 years</b> | <b>10 years</b> | <b>20 years</b> | <b>50 years</b> | <b>100 years</b> | <b>200 years</b> | <b>500 years</b> | <b>1000 years</b> |
|------------|----------------|----------------|-----------------|-----------------|-----------------|------------------|------------------|------------------|-------------------|
| <b>1h</b>  | 0.96           | 0.96           | 0.95            | 0.93            | 0.89            | 0.84             | 0.80             | 0.71             | 0.64              |
| <b>2h</b>  | 0.97           | 0.96           | 0.95            | 0.93            | 0.89            | 0.85             | 0.81             | 0.72             | 0.66              |
| <b>3h</b>  | 0.97           | 0.96           | 0.95            | 0.93            | 0.90            | 0.85             | 0.81             | 0.73             | 0.66              |
| <b>4h</b>  | 0.96           | 0.96           | 0.95            | 0.93            | 0.90            | 0.85             | 0.81             | 0.73             | 0.67              |
| <b>5h</b>  | 0.97           | 0.96           | 0.95            | 0.93            | 0.90            | 0.86             | 0.81             | 0.74             | 0.67              |
| <b>6h</b>  | 0.96           | 0.96           | 0.95            | 0.93            | 0.90            | 0.86             | 0.81             | 0.74             | 0.68              |
| <b>7h</b>  | 0.96           | 0.96           | 0.95            | 0.93            | 0.90            | 0.86             | 0.82             | 0.75             | 0.68              |
| <b>8h</b>  | 0.97           | 0.96           | 0.95            | 0.93            | 0.90            | 0.86             | 0.82             | 0.75             | 0.69              |
| <b>9h</b>  | 0.96           | 0.96           | 0.95            | 0.93            | 0.90            | 0.86             | 0.82             | 0.75             | 0.69              |
| <b>10h</b> | 0.96           | 0.96           | 0.95            | 0.93            | 0.90            | 0.87             | 0.82             | 0.75             | 0.68              |
| <b>11h</b> | 0.96           | 0.96           | 0.95            | 0.94            | 0.90            | 0.86             | 0.82             | 0.75             | 0.69              |
| <b>12h</b> | 0.97           | 0.96           | 0.95            | 0.93            | 0.90            | 0.86             | 0.83             | 0.76             | 0.69              |
| <b>13h</b> | 0.97           | 0.96           | 0.95            | 0.94            | 0.90            | 0.86             | 0.83             | 0.75             | 0.69              |
| <b>14h</b> | 0.96           | 0.96           | 0.95            | 0.93            | 0.90            | 0.86             | 0.83             | 0.76             | 0.69              |
| <b>15h</b> | 0.97           | 0.96           | 0.95            | 0.93            | 0.90            | 0.87             | 0.83             | 0.76             | 0.69              |
| <b>16h</b> | 0.96           | 0.96           | 0.95            | 0.93            | 0.90            | 0.87             | 0.83             | 0.76             | 0.69              |
| <b>17h</b> | 0.97           | 0.96           | 0.95            | 0.94            | 0.90            | 0.86             | 0.83             | 0.76             | 0.70              |
| <b>18h</b> | 0.96           | 0.96           | 0.95            | 0.93            | 0.90            | 0.86             | 0.83             | 0.76             | 0.69              |
| <b>19h</b> | 0.97           | 0.96           | 0.95            | 0.94            | 0.91            | 0.87             | 0.84             | 0.76             | 0.70              |
| <b>20h</b> | 0.97           | 0.96           | 0.95            | 0.94            | 0.91            | 0.88             | 0.83             | 0.76             | 0.70              |
| <b>21h</b> | 0.96           | 0.96           | 0.95            | 0.94            | 0.91            | 0.88             | 0.84             | 0.77             | 0.70              |
| <b>22h</b> | 0.96           | 0.96           | 0.95            | 0.94            | 0.90            | 0.87             | 0.84             | 0.76             | 0.70              |
| <b>23h</b> | 0.97           | 0.96           | 0.95            | 0.93            | 0.91            | 0.87             | 0.83             | 0.76             | 0.70              |
| <b>24h</b> | 0.96           | 0.96           | 0.95            | 0.94            | 0.90            | 0.87             | 0.84             | 0.77             | 0.70              |
| <b>36h</b> | 0.97           | 0.96           | 0.95            | 0.93            | 0.91            | 0.88             | 0.84             | 0.76             | 0.71              |
| <b>48h</b> | 0.97           | 0.96           | 0.95            | 0.94            | 0.90            | 0.88             | 0.84             | 0.77             | 0.71              |
| <b>72h</b> | 0.96           | 0.96           | 0.95            | 0.93            | 0.92            | 0.90             | 0.85             | 0.77             | 0.73              |

**Table S41.** Nash-Sutcliffe Efficiency for the final regionalized IDF datasets with a spatial resolution of  $0.1^{\circ} \times 0.1^{\circ}$  based on CHM\_PRE (post-processed using bivariate isotonic regression).

|            | <b>2</b>     | <b>5</b>     | <b>10</b>    | <b>20</b>    | <b>50</b>    | <b>100</b>   | <b>200</b>   | <b>500</b>   | <b>1000</b>  |
|------------|--------------|--------------|--------------|--------------|--------------|--------------|--------------|--------------|--------------|
|            | <b>years</b> |
| <b>1h</b>  | 0.95         | 0.94         | 0.93         | 0.91         | 0.87         | 0.83         | 0.79         | 0.72         | 0.65         |
| <b>2h</b>  | 0.95         | 0.95         | 0.94         | 0.92         | 0.88         | 0.85         | 0.81         | 0.74         | 0.67         |
| <b>3h</b>  | 0.95         | 0.94         | 0.94         | 0.92         | 0.89         | 0.86         | 0.81         | 0.74         | 0.67         |
| <b>4h</b>  | 0.95         | 0.95         | 0.94         | 0.92         | 0.89         | 0.86         | 0.82         | 0.75         | 0.68         |
| <b>5h</b>  | 0.95         | 0.95         | 0.94         | 0.93         | 0.89         | 0.86         | 0.82         | 0.75         | 0.68         |
| <b>6h</b>  | 0.95         | 0.95         | 0.94         | 0.93         | 0.90         | 0.86         | 0.82         | 0.75         | 0.67         |
| <b>7h</b>  | 0.95         | 0.95         | 0.94         | 0.93         | 0.90         | 0.86         | 0.82         | 0.75         | 0.69         |
| <b>8h</b>  | 0.95         | 0.95         | 0.94         | 0.93         | 0.90         | 0.86         | 0.82         | 0.75         | 0.68         |
| <b>9h</b>  | 0.95         | 0.95         | 0.94         | 0.93         | 0.90         | 0.86         | 0.82         | 0.75         | 0.70         |
| <b>10h</b> | 0.96         | 0.95         | 0.94         | 0.93         | 0.90         | 0.87         | 0.82         | 0.76         | 0.70         |
| <b>11h</b> | 0.96         | 0.96         | 0.94         | 0.93         | 0.90         | 0.87         | 0.83         | 0.76         | 0.70         |
| <b>12h</b> | 0.96         | 0.96         | 0.94         | 0.93         | 0.90         | 0.87         | 0.83         | 0.76         | 0.70         |
| <b>13h</b> | 0.96         | 0.95         | 0.94         | 0.93         | 0.90         | 0.87         | 0.83         | 0.76         | 0.70         |
| <b>14h</b> | 0.96         | 0.95         | 0.94         | 0.93         | 0.90         | 0.87         | 0.83         | 0.77         | 0.70         |
| <b>15h</b> | 0.96         | 0.95         | 0.94         | 0.93         | 0.90         | 0.87         | 0.83         | 0.76         | 0.71         |
| <b>16h</b> | 0.96         | 0.95         | 0.94         | 0.93         | 0.90         | 0.87         | 0.84         | 0.77         | 0.71         |
| <b>17h</b> | 0.96         | 0.95         | 0.94         | 0.93         | 0.91         | 0.87         | 0.83         | 0.77         | 0.71         |
| <b>18h</b> | 0.96         | 0.95         | 0.94         | 0.93         | 0.91         | 0.87         | 0.83         | 0.77         | 0.71         |
| <b>19h</b> | 0.96         | 0.96         | 0.94         | 0.93         | 0.91         | 0.87         | 0.84         | 0.77         | 0.71         |
| <b>20h</b> | 0.96         | 0.96         | 0.94         | 0.93         | 0.91         | 0.87         | 0.84         | 0.77         | 0.71         |
| <b>21h</b> | 0.96         | 0.96         | 0.94         | 0.93         | 0.91         | 0.87         | 0.84         | 0.77         | 0.71         |
| <b>22h</b> | 0.95         | 0.95         | 0.95         | 0.94         | 0.91         | 0.88         | 0.84         | 0.77         | 0.71         |
| <b>23h</b> | 0.95         | 0.95         | 0.94         | 0.93         | 0.91         | 0.88         | 0.84         | 0.77         | 0.71         |
| <b>24h</b> | 0.95         | 0.95         | 0.94         | 0.93         | 0.90         | 0.88         | 0.83         | 0.77         | 0.71         |
| <b>36h</b> | 0.95         | 0.95         | 0.94         | 0.93         | 0.91         | 0.88         | 0.84         | 0.78         | 0.72         |
| <b>48h</b> | 0.95         | 0.95         | 0.94         | 0.93         | 0.91         | 0.88         | 0.84         | 0.78         | 0.73         |
| <b>72h</b> | 0.95         | 0.95         | 0.94         | 0.93         | 0.91         | 0.88         | 0.85         | 0.78         | 0.73         |

**Table S42.** Percent Bias (%) for the final regionalized IDF datasets with a spatial resolution of  $0.1^{\circ} \times 0.1^{\circ}$  based on CHM\_PRE (post-processed using bivariate isotonic regression).

|           | <b>2</b>     | <b>5</b>     | <b>10</b>    | <b>20</b>    | <b>50</b>    | <b>100</b>   | <b>200</b>   | <b>500</b>   | <b>1000</b>  |
|-----------|--------------|--------------|--------------|--------------|--------------|--------------|--------------|--------------|--------------|
|           | <b>years</b> |
| <b>1h</b> | 0.00         | -0.02        | 0.06         | -0.13        | 0.26         | 0.10         | 0.06         | 0.20         | 0.11         |
| <b>2h</b> | -0.01        | 0.00         | -0.18        | 0.11         | 0.03         | 0.01         | 0.02         | 0.20         | 0.34         |
| <b>3h</b> | 0.00         | 0.00         | -0.11        | 0.14         | 0.01         | -0.03        | 0.04         | 0.08         | 0.32         |
| <b>4h</b> | 0.01         | 0.00         | -0.06        | -0.08        | -0.03        | -0.02        | -0.03        | 0.07         | 0.36         |
| <b>5h</b> | -0.04        | -0.13        | -0.14        | -0.05        | -0.04        | -0.06        | -0.10        | -0.38        | 0.34         |
| <b>6h</b> | -0.02        | 0.03         | -0.05        | -0.08        | -0.02        | -0.03        | 0.02         | -0.32        | 0.74         |

|            |       |       |       |       |       |       |       |       |       |
|------------|-------|-------|-------|-------|-------|-------|-------|-------|-------|
| <b>7h</b>  | -0.03 | -0.36 | -0.07 | -0.08 | -0.07 | -0.04 | -0.04 | 0.30  | 0.20  |
| <b>8h</b>  | -0.02 | -0.14 | -0.01 | -0.05 | -0.04 | -0.09 | -0.25 | -0.07 | -0.04 |
| <b>9h</b>  | 0.01  | 0.28  | -0.09 | -0.08 | -0.05 | -0.01 | -0.15 | 0.43  | -0.35 |
| <b>10h</b> | 0.35  | 0.00  | -0.06 | -0.08 | -0.04 | -0.01 | 0.36  | -0.13 | 0.36  |
| <b>11h</b> | -0.13 | -0.14 | -0.10 | -0.08 | -0.11 | -0.14 | 0.15  | -0.48 | -0.48 |
| <b>12h</b> | -0.40 | 0.04  | -0.07 | -0.09 | -0.08 | -0.04 | -0.10 | 0.04  | 0.47  |
| <b>13h</b> | 0.42  | -0.66 | -0.13 | -0.09 | -0.06 | -0.08 | 0.20  | 0.51  | -0.16 |
| <b>14h</b> | -0.13 | -0.14 | -0.14 | -0.07 | -0.09 | 0.03  | -0.50 | -0.05 | 0.21  |
| <b>15h</b> | 0.03  | -0.10 | -0.13 | -0.10 | -0.06 | 0.02  | 0.33  | -0.86 | -0.25 |
| <b>16h</b> | -0.62 | -0.04 | -0.18 | -0.12 | -0.09 | -0.08 | -0.07 | 0.05  | -0.56 |
| <b>17h</b> | -0.12 | -0.01 | -0.07 | -0.07 | -0.02 | -0.04 | -0.56 | -0.12 | -0.34 |
| <b>18h</b> | 0.08  | 0.59  | -0.14 | 0.23  | -0.10 | -0.01 | 0.41  | -0.73 | 0.01  |
| <b>19h</b> | 0.58  | -0.10 | -0.13 | -0.06 | -0.04 | -0.14 | 0.13  | 0.36  | 0.42  |
| <b>20h</b> | -0.72 | -0.18 | -0.04 | -0.49 | -0.08 | -0.08 | -0.51 | -0.13 | -0.36 |
| <b>21h</b> | -0.14 | 0.07  | -0.01 | -0.10 | -0.04 | -0.02 | 0.32  | 0.13  | 0.12  |
| <b>22h</b> | -0.15 | -0.89 | 0.34  | 0.30  | 0.00  | -0.07 | -0.13 | -0.32 | -0.77 |
| <b>23h</b> | 0.00  | -0.31 | -0.39 | -0.64 | -0.05 | -0.04 | -0.74 | -0.47 | 0.41  |
| <b>24h</b> | -0.13 | -0.21 | -0.26 | -0.34 | -0.04 | -0.08 | -0.28 | -1.22 | -1.26 |
| <b>36h</b> | 0.01  | -0.02 | -0.19 | -0.10 | -0.05 | -0.28 | 0.02  | 0.09  | -0.16 |
| <b>48h</b> | 0.01  | -0.07 | -0.02 | 0.24  | 0.00  | -0.05 | -0.21 | 0.14  | 0.06  |
| <b>72h</b> | 0.07  | -0.14 | 0.06  | -0.21 | -0.04 | -0.14 | 0.06  | -0.43 | 0.25  |

**Table S43.** Root Mean Square Error for the final regionalized IDF datasets with a spatial resolution of  $0.1^\circ \times 0.1^\circ$  based on CHM\_PRE (post-processed using bivariate isotonic regression).

|            | <b>2 years</b> | <b>5 years</b> | <b>10 years</b> | <b>20 years</b> | <b>50 years</b> | <b>100 years</b> | <b>200 years</b> | <b>500 years</b> | <b>1000 years</b> |
|------------|----------------|----------------|-----------------|-----------------|-----------------|------------------|------------------|------------------|-------------------|
| <b>1h</b>  | 2.61           | 3.76           | 4.98            | 6.73            | 9.98            | 13.28            | 17.72            | 26.05            | 34.73             |
| <b>2h</b>  | 1.69           | 2.46           | 3.20            | 4.29            | 6.32            | 8.47             | 11.35            | 16.78            | 22.71             |
| <b>3h</b>  | 1.31           | 1.93           | 2.47            | 3.24            | 4.78            | 6.41             | 8.61             | 12.74            | 17.24             |
| <b>4h</b>  | 1.10           | 1.56           | 2.02            | 2.70            | 3.92            | 5.25             | 7.05             | 10.39            | 14.12             |
| <b>5h</b>  | 0.95           | 1.32           | 1.74            | 2.27            | 3.33            | 4.47             | 6.03             | 8.84             | 12.06             |
| <b>6h</b>  | 0.84           | 1.16           | 1.52            | 1.98            | 2.89            | 3.90             | 5.30             | 7.77             | 10.65             |
| <b>7h</b>  | 0.75           | 1.03           | 1.35            | 1.76            | 2.60            | 3.50             | 4.70             | 6.95             | 9.34              |
| <b>8h</b>  | 0.68           | 0.95           | 1.23            | 1.59            | 2.35            | 3.17             | 4.24             | 6.28             | 8.48              |
| <b>9h</b>  | 0.62           | 0.86           | 1.13            | 1.45            | 2.13            | 2.91             | 3.90             | 5.76             | 7.64              |
| <b>10h</b> | 0.55           | 0.77           | 1.04            | 1.34            | 1.98            | 2.68             | 3.60             | 5.28             | 7.04              |
| <b>11h</b> | 0.49           | 0.71           | 0.97            | 1.24            | 1.85            | 2.49             | 3.32             | 4.94             | 6.57              |
| <b>12h</b> | 0.48           | 0.66           | 0.90            | 1.17            | 1.72            | 2.32             | 3.11             | 4.64             | 6.15              |
| <b>13h</b> | 0.45           | 0.65           | 0.85            | 1.11            | 1.62            | 2.19             | 2.92             | 4.36             | 5.76              |
| <b>14h</b> | 0.41           | 0.63           | 0.81            | 1.05            | 1.53            | 2.06             | 2.76             | 4.04             | 5.44              |
| <b>15h</b> | 0.38           | 0.60           | 0.77            | 1.00            | 1.46            | 1.96             | 2.62             | 3.86             | 5.14              |
| <b>16h</b> | 0.39           | 0.58           | 0.73            | 0.95            | 1.38            | 1.87             | 2.47             | 3.65             | 4.86              |
| <b>17h</b> | 0.37           | 0.55           | 0.70            | 0.90            | 1.31            | 1.79             | 2.38             | 3.48             | 4.65              |

|            |      |      |      |      |      |      |      |      |      |
|------------|------|------|------|------|------|------|------|------|------|
| <b>18h</b> | 0.35 | 0.52 | 0.67 | 0.86 | 1.26 | 1.71 | 2.28 | 3.36 | 4.45 |
| <b>19h</b> | 0.34 | 0.46 | 0.65 | 0.83 | 1.21 | 1.63 | 2.17 | 3.22 | 4.25 |
| <b>20h</b> | 0.33 | 0.46 | 0.63 | 0.80 | 1.16 | 1.58 | 2.10 | 3.08 | 4.10 |
| <b>21h</b> | 0.33 | 0.42 | 0.60 | 0.77 | 1.12 | 1.52 | 2.01 | 2.96 | 3.95 |
| <b>22h</b> | 0.33 | 0.45 | 0.58 | 0.73 | 1.08 | 1.46 | 1.92 | 2.86 | 3.86 |
| <b>23h</b> | 0.32 | 0.45 | 0.57 | 0.74 | 1.04 | 1.41 | 1.88 | 2.76 | 3.72 |
| <b>24h</b> | 0.31 | 0.43 | 0.56 | 0.72 | 1.02 | 1.36 | 1.84 | 2.69 | 3.57 |
| <b>36h</b> | 0.23 | 0.33 | 0.41 | 0.53 | 0.75 | 1.01 | 1.32 | 1.95 | 2.61 |
| <b>48h</b> | 0.19 | 0.27 | 0.33 | 0.43 | 0.61 | 0.82 | 1.09 | 1.56 | 2.08 |
| <b>72h</b> | 0.14 | 0.21 | 0.26 | 0.32 | 0.45 | 0.60 | 0.78 | 1.17 | 1.52 |

**Table S44.** Kling-Gupta Efficiency for the final regionalized IDF datasets with a spatial resolution of 0.1°×0.1° based on CHM\_PRE (post-processed using bivariate isotonic regression).

|            | <b>2 years</b> | <b>5 years</b> | <b>10 years</b> | <b>20 years</b> | <b>50 years</b> | <b>100 years</b> | <b>200 years</b> | <b>500 years</b> | <b>1000 years</b> |
|------------|----------------|----------------|-----------------|-----------------|-----------------|------------------|------------------|------------------|-------------------|
| <b>1h</b>  | 0.96           | 0.96           | 0.95            | 0.93            | 0.89            | 0.87             | 0.84             | 0.78             | 0.73              |
| <b>2h</b>  | 0.97           | 0.96           | 0.95            | 0.93            | 0.91            | 0.89             | 0.85             | 0.80             | 0.75              |
| <b>3h</b>  | 0.97           | 0.96           | 0.95            | 0.94            | 0.92            | 0.89             | 0.86             | 0.80             | 0.76              |
| <b>4h</b>  | 0.96           | 0.96           | 0.95            | 0.94            | 0.92            | 0.90             | 0.86             | 0.81             | 0.76              |
| <b>5h</b>  | 0.97           | 0.96           | 0.95            | 0.94            | 0.92            | 0.90             | 0.87             | 0.82             | 0.76              |
| <b>6h</b>  | 0.96           | 0.96           | 0.95            | 0.95            | 0.93            | 0.90             | 0.87             | 0.82             | 0.76              |
| <b>7h</b>  | 0.96           | 0.96           | 0.96            | 0.95            | 0.92            | 0.90             | 0.87             | 0.82             | 0.77              |
| <b>8h</b>  | 0.96           | 0.96           | 0.96            | 0.95            | 0.93            | 0.90             | 0.88             | 0.82             | 0.77              |
| <b>9h</b>  | 0.96           | 0.96           | 0.96            | 0.95            | 0.93            | 0.90             | 0.87             | 0.82             | 0.78              |
| <b>10h</b> | 0.96           | 0.96           | 0.96            | 0.95            | 0.93            | 0.90             | 0.87             | 0.82             | 0.77              |
| <b>11h</b> | 0.96           | 0.96           | 0.96            | 0.95            | 0.93            | 0.91             | 0.87             | 0.82             | 0.78              |
| <b>12h</b> | 0.97           | 0.96           | 0.96            | 0.95            | 0.93            | 0.91             | 0.88             | 0.82             | 0.77              |
| <b>13h</b> | 0.97           | 0.96           | 0.96            | 0.95            | 0.93            | 0.91             | 0.87             | 0.82             | 0.78              |
| <b>14h</b> | 0.96           | 0.96           | 0.96            | 0.95            | 0.93            | 0.91             | 0.88             | 0.83             | 0.78              |
| <b>15h</b> | 0.97           | 0.96           | 0.96            | 0.95            | 0.93            | 0.91             | 0.88             | 0.83             | 0.78              |
| <b>16h</b> | 0.97           | 0.96           | 0.96            | 0.95            | 0.93            | 0.91             | 0.88             | 0.83             | 0.79              |
| <b>17h</b> | 0.97           | 0.96           | 0.96            | 0.95            | 0.93            | 0.91             | 0.88             | 0.83             | 0.79              |
| <b>18h</b> | 0.97           | 0.96           | 0.96            | 0.95            | 0.93            | 0.91             | 0.88             | 0.83             | 0.79              |
| <b>19h</b> | 0.97           | 0.96           | 0.96            | 0.95            | 0.93            | 0.91             | 0.87             | 0.83             | 0.78              |
| <b>20h</b> | 0.97           | 0.96           | 0.96            | 0.95            | 0.93            | 0.91             | 0.88             | 0.83             | 0.78              |
| <b>21h</b> | 0.97           | 0.96           | 0.96            | 0.95            | 0.93            | 0.91             | 0.88             | 0.83             | 0.78              |
| <b>22h</b> | 0.97           | 0.96           | 0.96            | 0.95            | 0.93            | 0.91             | 0.89             | 0.83             | 0.78              |
| <b>23h</b> | 0.97           | 0.96           | 0.97            | 0.95            | 0.93            | 0.91             | 0.88             | 0.84             | 0.78              |
| <b>24h</b> | 0.97           | 0.96           | 0.96            | 0.96            | 0.93            | 0.91             | 0.88             | 0.84             | 0.79              |
| <b>36h</b> | 0.97           | 0.97           | 0.96            | 0.96            | 0.93            | 0.91             | 0.89             | 0.84             | 0.79              |
| <b>48h</b> | 0.97           | 0.96           | 0.96            | 0.95            | 0.93            | 0.91             | 0.88             | 0.84             | 0.80              |
| <b>72h</b> | 0.96           | 0.96           | 0.95            | 0.96            | 0.94            | 0.91             | 0.90             | 0.84             | 0.80              |

**Table S45.** Nash-Sutcliffe Efficiency for the final regionalized IDF datasets with a spatial resolution of  $0.5^{\circ} \times 0.5^{\circ}$  based on CGDPP (post-processed using bivariate isotonic regression).

|            | <b>2</b>     | <b>5</b>     | <b>10</b>    | <b>20</b>    | <b>50</b>    | <b>100</b>   | <b>200</b>   | <b>500</b>   | <b>1000</b>  |
|------------|--------------|--------------|--------------|--------------|--------------|--------------|--------------|--------------|--------------|
|            | <b>years</b> |
| <b>1h</b>  | 0.95         | 0.94         | 0.93         | 0.90         | 0.83         | 0.78         | 0.72         | 0.62         | 0.54         |
| <b>2h</b>  | 0.95         | 0.94         | 0.93         | 0.91         | 0.84         | 0.79         | 0.73         | 0.64         | 0.55         |
| <b>3h</b>  | 0.95         | 0.94         | 0.93         | 0.91         | 0.85         | 0.80         | 0.74         | 0.64         | 0.56         |
| <b>4h</b>  | 0.95         | 0.94         | 0.93         | 0.91         | 0.85         | 0.80         | 0.74         | 0.65         | 0.57         |
| <b>5h</b>  | 0.95         | 0.94         | 0.93         | 0.91         | 0.85         | 0.80         | 0.75         | 0.65         | 0.57         |
| <b>6h</b>  | 0.95         | 0.94         | 0.93         | 0.91         | 0.86         | 0.81         | 0.75         | 0.65         | 0.58         |
| <b>7h</b>  | 0.95         | 0.94         | 0.92         | 0.91         | 0.86         | 0.81         | 0.75         | 0.66         | 0.58         |
| <b>8h</b>  | 0.95         | 0.94         | 0.94         | 0.90         | 0.86         | 0.81         | 0.75         | 0.66         | 0.58         |
| <b>9h</b>  | 0.95         | 0.94         | 0.93         | 0.91         | 0.86         | 0.81         | 0.75         | 0.66         | 0.59         |
| <b>10h</b> | 0.95         | 0.94         | 0.94         | 0.92         | 0.86         | 0.81         | 0.76         | 0.66         | 0.59         |
| <b>11h</b> | 0.95         | 0.94         | 0.94         | 0.91         | 0.86         | 0.81         | 0.76         | 0.66         | 0.59         |
| <b>12h</b> | 0.95         | 0.94         | 0.94         | 0.91         | 0.86         | 0.82         | 0.76         | 0.66         | 0.59         |
| <b>13h</b> | 0.95         | 0.94         | 0.94         | 0.91         | 0.86         | 0.82         | 0.76         | 0.67         | 0.59         |
| <b>14h</b> | 0.95         | 0.94         | 0.94         | 0.91         | 0.86         | 0.81         | 0.76         | 0.66         | 0.59         |
| <b>15h</b> | 0.95         | 0.95         | 0.93         | 0.90         | 0.86         | 0.81         | 0.76         | 0.67         | 0.59         |
| <b>16h</b> | 0.95         | 0.95         | 0.93         | 0.91         | 0.86         | 0.82         | 0.77         | 0.67         | 0.60         |
| <b>17h</b> | 0.95         | 0.95         | 0.94         | 0.90         | 0.86         | 0.82         | 0.77         | 0.67         | 0.60         |
| <b>18h</b> | 0.95         | 0.95         | 0.94         | 0.91         | 0.87         | 0.82         | 0.77         | 0.68         | 0.60         |
| <b>19h</b> | 0.95         | 0.95         | 0.94         | 0.91         | 0.86         | 0.82         | 0.77         | 0.68         | 0.60         |
| <b>20h</b> | 0.95         | 0.95         | 0.94         | 0.92         | 0.87         | 0.82         | 0.77         | 0.68         | 0.60         |
| <b>21h</b> | 0.95         | 0.95         | 0.94         | 0.92         | 0.87         | 0.82         | 0.77         | 0.68         | 0.60         |
| <b>22h</b> | 0.95         | 0.95         | 0.94         | 0.91         | 0.87         | 0.82         | 0.77         | 0.68         | 0.60         |
| <b>23h</b> | 0.95         | 0.95         | 0.94         | 0.91         | 0.87         | 0.82         | 0.77         | 0.68         | 0.61         |
| <b>24h</b> | 0.95         | 0.95         | 0.94         | 0.91         | 0.87         | 0.82         | 0.77         | 0.68         | 0.61         |
| <b>36h</b> | 0.95         | 0.95         | 0.94         | 0.91         | 0.87         | 0.83         | 0.78         | 0.68         | 0.61         |
| <b>48h</b> | 0.95         | 0.95         | 0.93         | 0.91         | 0.87         | 0.83         | 0.78         | 0.69         | 0.62         |
| <b>72h</b> | 0.95         | 0.94         | 0.94         | 0.91         | 0.87         | 0.84         | 0.79         | 0.71         | 0.63         |

**Table S46.** Percent Bias (%) for the final regionalized IDF datasets with a spatial resolution of  $0.5^{\circ} \times 0.5^{\circ}$  based on CGDPP (post-processed using bivariate isotonic regression).

|           | <b>2</b>     | <b>5</b>     | <b>10</b>    | <b>20</b>    | <b>50</b>    | <b>100</b>   | <b>200</b>   | <b>500</b>   | <b>1000</b>  |
|-----------|--------------|--------------|--------------|--------------|--------------|--------------|--------------|--------------|--------------|
|           | <b>years</b> |
| <b>1h</b> | -0.01        | 0.00         | -0.06        | 0.01         | 0.14         | 0.05         | 0.19         | 0.25         | 0.51         |
| <b>2h</b> | -0.02        | 0.00         | 0.00         | -0.10        | 0.13         | 0.12         | 0.25         | 0.29         | 0.43         |
| <b>3h</b> | -0.02        | -0.03        | 0.03         | -0.06        | 0.15         | 0.09         | 0.19         | 0.26         | 0.33         |
| <b>4h</b> | 0.00         | 0.00         | 0.02         | 0.08         | 0.06         | 0.06         | 0.19         | 0.29         | 0.34         |
| <b>5h</b> | 0.00         | 0.00         | 0.11         | -0.12        | 0.07         | 0.12         | 0.10         | 0.23         | 0.39         |
| <b>6h</b> | -0.03        | -0.05        | -0.19        | 0.18         | 0.08         | 0.03         | 0.14         | 0.29         | 0.42         |

|            |       |       |       |       |       |       |       |       |       |
|------------|-------|-------|-------|-------|-------|-------|-------|-------|-------|
| <b>7h</b>  | -0.02 | -0.05 | 0.11  | -0.33 | 0.10  | 0.07  | 0.18  | 0.26  | 0.49  |
| <b>8h</b>  | -0.01 | 0.04  | 0.09  | 0.02  | -0.01 | 0.08  | 0.21  | 0.33  | 0.45  |
| <b>9h</b>  | 0.00  | -0.05 | -0.11 | 0.32  | 0.04  | 0.11  | 0.25  | 0.63  | 0.53  |
| <b>10h</b> | -0.01 | 0.04  | -0.33 | 0.11  | 0.05  | 0.13  | -0.02 | -0.66 | 0.92  |
| <b>11h</b> | -0.01 | 0.02  | 0.02  | -0.45 | 0.03  | 0.15  | 0.03  | -0.19 | -0.81 |
| <b>12h</b> | 0.00  | -0.06 | 0.35  | -0.03 | 0.01  | 0.12  | 0.13  | -0.08 | -0.41 |
| <b>13h</b> | -0.01 | -0.03 | -0.17 | -0.08 | 0.04  | 0.49  | 0.49  | -0.06 | -0.26 |
| <b>14h</b> | 0.00  | 0.00  | 0.05  | 0.02  | -0.04 | -0.30 | -0.32 | -0.21 | -0.33 |
| <b>15h</b> | 0.01  | -0.05 | -0.61 | -0.01 | -0.07 | 0.10  | 0.40  | -0.13 | -0.03 |
| <b>16h</b> | 0.05  | 0.00  | 0.44  | -0.04 | 0.02  | 0.34  | -0.36 | -0.25 | 0.01  |
| <b>17h</b> | 0.00  | 0.01  | -0.68 | -0.01 | 0.06  | 0.01  | 0.50  | 0.04  | -0.11 |
| <b>18h</b> | -0.07 | 0.02  | -0.04 | 0.09  | 0.02  | 0.00  | 0.19  | -0.11 | 0.06  |
| <b>19h</b> | 0.00  | 0.02  | 0.02  | 0.74  | 0.07  | 0.08  | 0.16  | -0.33 | -0.08 |
| <b>20h</b> | 0.01  | 0.02  | -0.11 | 0.04  | 0.01  | -0.46 | -0.41 | -0.15 | -0.40 |
| <b>21h</b> | 0.01  | 0.02  | -0.11 | -0.73 | 0.35  | -0.05 | -0.09 | 0.25  | -0.40 |
| <b>22h</b> | 0.03  | 0.03  | -0.09 | -0.19 | -0.08 | 0.12  | -0.15 | -0.27 | -0.17 |
| <b>23h</b> | 0.08  | 0.02  | -0.09 | -0.03 | -0.42 | 0.04  | 0.18  | -0.29 | 0.70  |
| <b>24h</b> | -0.10 | 0.03  | -0.08 | 0.00  | -0.15 | -0.17 | -0.11 | -0.30 | -1.15 |
| <b>36h</b> | -0.01 | 0.05  | -0.01 | 0.02  | 0.02  | -0.19 | 0.21  | -0.06 | -0.02 |
| <b>48h</b> | 0.04  | -0.04 | -0.13 | -0.15 | 0.17  | -0.01 | 0.00  | 0.18  | -0.15 |
| <b>72h</b> | 0.05  | -0.04 | -0.05 | 0.04  | -0.12 | -0.10 | -0.21 | -0.17 | 0.21  |

**Table S47.** Root Mean Square Error for the final regionalized IDF datasets with a spatial resolution of  $0.5^\circ \times 0.5^\circ$  based on CGDPP (post-processed using bivariate isotonic regression).

|            | <b>2 years</b> | <b>5 years</b> | <b>10 years</b> | <b>20 years</b> | <b>50 years</b> | <b>100 years</b> | <b>200 years</b> | <b>500 years</b> | <b>1000 years</b> |
|------------|----------------|----------------|-----------------|-----------------|-----------------|------------------|------------------|------------------|-------------------|
| <b>1h</b>  | 2.60           | 3.76           | 4.97            | 6.86            | 11.39           | 15.37            | 20.58            | 30.17            | 40.15             |
| <b>2h</b>  | 1.69           | 2.46           | 3.26            | 4.42            | 7.38            | 9.96             | 13.42            | 19.71            | 26.33             |
| <b>3h</b>  | 1.32           | 1.92           | 2.54            | 3.41            | 5.62            | 7.59             | 10.20            | 15.01            | 20.02             |
| <b>4h</b>  | 1.10           | 1.61           | 2.10            | 2.82            | 4.57            | 6.22             | 8.38             | 12.32            | 16.39             |
| <b>5h</b>  | 0.95           | 1.39           | 1.79            | 2.57            | 3.93            | 5.32             | 7.13             | 10.47            | 13.98             |
| <b>6h</b>  | 0.84           | 1.21           | 1.71            | 2.12            | 3.45            | 4.65             | 6.26             | 9.21             | 12.18             |
| <b>7h</b>  | 0.75           | 1.10           | 1.55            | 2.02            | 3.09            | 4.17             | 5.57             | 8.18             | 10.87             |
| <b>8h</b>  | 0.68           | 1.00           | 1.27            | 1.87            | 2.79            | 3.77             | 5.03             | 7.40             | 9.82              |
| <b>9h</b>  | 0.63           | 0.91           | 1.23            | 1.70            | 2.57            | 3.45             | 4.63             | 6.76             | 8.95              |
| <b>10h</b> | 0.58           | 0.84           | 1.08            | 1.45            | 2.36            | 3.18             | 4.25             | 6.27             | 8.29              |
| <b>11h</b> | 0.54           | 0.79           | 1.02            | 1.42            | 2.21            | 2.97             | 3.95             | 5.85             | 7.69              |
| <b>12h</b> | 0.51           | 0.74           | 0.96            | 1.37            | 2.06            | 2.77             | 3.71             | 5.47             | 7.21              |
| <b>13h</b> | 0.48           | 0.70           | 0.92            | 1.31            | 1.94            | 2.60             | 3.48             | 5.13             | 6.78              |
| <b>14h</b> | 0.45           | 0.66           | 0.84            | 1.24            | 1.82            | 2.49             | 3.31             | 4.87             | 6.41              |
| <b>15h</b> | 0.43           | 0.63           | 0.85            | 1.18            | 1.73            | 2.37             | 3.14             | 4.59             | 6.08              |
| <b>16h</b> | 0.41           | 0.60           | 0.81            | 1.13            | 1.66            | 2.24             | 2.96             | 4.37             | 5.77              |
| <b>17h</b> | 0.39           | 0.58           | 0.73            | 1.08            | 1.58            | 2.11             | 2.82             | 4.18             | 5.51              |

|            |      |      |      |      |      |      |      |      |      |
|------------|------|------|------|------|------|------|------|------|------|
| <b>18h</b> | 0.38 | 0.55 | 0.71 | 1.03 | 1.51 | 2.03 | 2.70 | 3.98 | 5.27 |
| <b>19h</b> | 0.36 | 0.53 | 0.69 | 0.97 | 1.46 | 1.94 | 2.58 | 3.82 | 5.05 |
| <b>20h</b> | 0.35 | 0.51 | 0.66 | 0.86 | 1.40 | 1.89 | 2.51 | 3.67 | 4.85 |
| <b>21h</b> | 0.34 | 0.49 | 0.64 | 0.87 | 1.34 | 1.83 | 2.42 | 3.53 | 4.67 |
| <b>22h</b> | 0.32 | 0.48 | 0.61 | 0.86 | 1.30 | 1.77 | 2.34 | 3.39 | 4.50 |
| <b>23h</b> | 0.31 | 0.46 | 0.60 | 0.85 | 1.24 | 1.69 | 2.26 | 3.28 | 4.33 |
| <b>24h</b> | 0.31 | 0.45 | 0.58 | 0.82 | 1.21 | 1.64 | 2.19 | 3.18 | 4.17 |
| <b>36h</b> | 0.23 | 0.33 | 0.43 | 0.62 | 0.90 | 1.20 | 1.59 | 2.34 | 3.07 |
| <b>48h</b> | 0.19 | 0.27 | 0.38 | 0.50 | 0.73 | 0.96 | 1.28 | 1.86 | 2.45 |
| <b>72h</b> | 0.14 | 0.21 | 0.26 | 0.38 | 0.54 | 0.71 | 0.94 | 1.35 | 1.79 |

**Table S48.** Kling-Gupta Efficiency for the final regionalized IDF datasets with a spatial resolution of  $0.5^\circ \times 0.5^\circ$  based on CGDPP (post-processed using bivariate isotonic regression).

|            | <b>2 years</b> | <b>5 years</b> | <b>10 years</b> | <b>20 years</b> | <b>50 years</b> | <b>100 years</b> | <b>200 years</b> | <b>500 years</b> | <b>1000 years</b> |
|------------|----------------|----------------|-----------------|-----------------|-----------------|------------------|------------------|------------------|-------------------|
| <b>1h</b>  | 0.96           | 0.96           | 0.95            | 0.93            | 0.87            | 0.83             | 0.78             | 0.71             | 0.64              |
| <b>2h</b>  | 0.97           | 0.96           | 0.95            | 0.94            | 0.88            | 0.85             | 0.80             | 0.72             | 0.66              |
| <b>3h</b>  | 0.96           | 0.96           | 0.95            | 0.93            | 0.89            | 0.85             | 0.81             | 0.73             | 0.66              |
| <b>4h</b>  | 0.96           | 0.96           | 0.95            | 0.93            | 0.89            | 0.85             | 0.81             | 0.74             | 0.67              |
| <b>5h</b>  | 0.96           | 0.96           | 0.95            | 0.93            | 0.89            | 0.86             | 0.81             | 0.74             | 0.67              |
| <b>6h</b>  | 0.96           | 0.96           | 0.94            | 0.93            | 0.89            | 0.86             | 0.81             | 0.74             | 0.68              |
| <b>7h</b>  | 0.96           | 0.96           | 0.94            | 0.93            | 0.90            | 0.86             | 0.82             | 0.74             | 0.68              |
| <b>8h</b>  | 0.96           | 0.96           | 0.95            | 0.93            | 0.90            | 0.86             | 0.82             | 0.74             | 0.68              |
| <b>9h</b>  | 0.96           | 0.96           | 0.95            | 0.93            | 0.90            | 0.86             | 0.82             | 0.74             | 0.69              |
| <b>10h</b> | 0.96           | 0.96           | 0.95            | 0.93            | 0.90            | 0.87             | 0.82             | 0.75             | 0.68              |
| <b>11h</b> | 0.97           | 0.96           | 0.95            | 0.93            | 0.90            | 0.87             | 0.83             | 0.75             | 0.69              |
| <b>12h</b> | 0.97           | 0.96           | 0.95            | 0.93            | 0.90            | 0.87             | 0.83             | 0.75             | 0.69              |
| <b>13h</b> | 0.97           | 0.96           | 0.95            | 0.93            | 0.90            | 0.87             | 0.83             | 0.75             | 0.69              |
| <b>14h</b> | 0.97           | 0.96           | 0.95            | 0.93            | 0.90            | 0.87             | 0.83             | 0.76             | 0.69              |
| <b>15h</b> | 0.97           | 0.96           | 0.95            | 0.93            | 0.90            | 0.87             | 0.83             | 0.76             | 0.69              |
| <b>16h</b> | 0.97           | 0.96           | 0.95            | 0.93            | 0.90            | 0.87             | 0.83             | 0.76             | 0.69              |
| <b>17h</b> | 0.97           | 0.96           | 0.95            | 0.93            | 0.90            | 0.87             | 0.83             | 0.76             | 0.69              |
| <b>18h</b> | 0.97           | 0.96           | 0.95            | 0.93            | 0.90            | 0.88             | 0.83             | 0.76             | 0.69              |
| <b>19h</b> | 0.97           | 0.96           | 0.95            | 0.93            | 0.90            | 0.87             | 0.83             | 0.76             | 0.70              |
| <b>20h</b> | 0.97           | 0.96           | 0.95            | 0.93            | 0.91            | 0.88             | 0.83             | 0.76             | 0.70              |
| <b>21h</b> | 0.97           | 0.96           | 0.95            | 0.94            | 0.91            | 0.87             | 0.83             | 0.76             | 0.70              |
| <b>22h</b> | 0.97           | 0.96           | 0.95            | 0.94            | 0.91            | 0.88             | 0.84             | 0.76             | 0.70              |
| <b>23h</b> | 0.97           | 0.96           | 0.95            | 0.93            | 0.91            | 0.88             | 0.83             | 0.77             | 0.70              |
| <b>24h</b> | 0.97           | 0.96           | 0.95            | 0.93            | 0.91            | 0.88             | 0.84             | 0.77             | 0.70              |
| <b>36h</b> | 0.97           | 0.96           | 0.95            | 0.93            | 0.91            | 0.88             | 0.84             | 0.77             | 0.70              |
| <b>48h</b> | 0.97           | 0.96           | 0.95            | 0.94            | 0.92            | 0.88             | 0.84             | 0.77             | 0.72              |
| <b>72h</b> | 0.96           | 0.96           | 0.95            | 0.94            | 0.92            | 0.90             | 0.85             | 0.78             | 0.71              |

**Table S49.** Statistical characteristics of 4 representative observed station-level IDF cases(mm/h).

|      | Mean  | Median | STD*  | Minimum | 5 <sup>th</sup> Percentile | 95 <sup>th</sup> Percentile | Maximum |
|------|-------|--------|-------|---------|----------------------------|-----------------------------|---------|
| SDSR | 40.68 | 44.37  | 15.59 | 2.63    | 12.19                      | 61.92                       | 94.54   |
| SDLR | 76.38 | 77.05  | 32.49 | 4.52    | 21.5                       | 129.03                      | 221.95  |
| LDSR | 4.5   | 4.62   | 1.94  | 0.17    | 1.39                       | 7.61                        | 13.34   |
| LDLR | 8.42  | 8.31   | 3.87  | 0.36    | 2.42                       | 14.78                       | 27.17   |

\*STD represents the standard deviation.
